1 **Comparative genomic analyses of *Lactococcus garvieae* isolated from bovine mastitis**  
2 **in China**

3 Yushan Lin<sup>1#</sup>, Jinge Han<sup>2#</sup>, Herman W. Barkema<sup>3</sup>, Yue Wang<sup>1</sup>, Jian Gao<sup>1</sup> John P. Kastelic<sup>3</sup>,  
4 Bo Han<sup>1\*</sup>, Shunyi Qin<sup>2\*</sup>, Zhaoju Deng<sup>1\*</sup>

5 <sup>1</sup>Department of Clinical Veterinary Medicine, College of Veterinary Medicine, China  
6 Agricultural University, Beijing, 100193, P. R. China

7 <sup>2</sup>College of Animal Science and Veterinary Medicine, Tianjin Agricultural University,  
8 Tianjin, 300384, P. R. China

9 <sup>3</sup>Department of Production Animal Health, Faculty of Veterinary Medicine, University of  
10 Calgary, Calgary, AB, Canada, T2N 4N1

11

12 <sup>#</sup>Both contributed equally

13 **\*Correspondence:** Bo Han: [hanbo@cau.edu.cn](mailto:hanbo@cau.edu.cn); Shunyi Qin: [qinshunyi@163.com](mailto:qinshunyi@163.com);

14 Zhaoju Deng: [zhaoju2020@hotmail.com](mailto:zhaoju2020@hotmail.com)

15

16 **Running title:** Comprehensive genomic analyses of *Lactococcus garvieae*

17

18 **No. of words: 4157**

19 **No. of Figures: 7**

20 **No. of Tables: 3**

21 **ABSTRACT** *Lactococcus garvieae* is an emerging zoonotic pathogen, but there are  
22 few reports regarding bovine mastitis. The recent prevalence of *L. garvieae* poses an  
23 increasing disease threat and global public health risk. A total of 39 *L. garvieae*  
24 isolates were obtained from 2899 bovine clinical mastitis milk samples in 6 provinces  
25 of China from 2017 to 2021. Five clonal complexes were determined from 32 MLST  
26 types of *L. garvieae*; ST46 was the predominant sequence type and 13 novel MLST  
27 types were identified. All isolates were resistant to chloramphenicol and clindamycin,  
28 but susceptible to penicillin, ampicillin, amoxicillin-clavulanic acid, imipenem,  
29 ceftiofur, enrofloxacin, and marbofloxacin. Based on genomic analyses, *L. garvieae*  
30 had 6310 genes, including 1015, 3641 and 1654 core, accessory and unique genes. All  
31 isolates had virulence genes coding for collagenase, fibronectin-binding protein,  
32 Glyceraldehyde-3-phosphate dehydrogenase, superoxide dismutase and NADH  
33 oxidase. Most isolates had *lsaD* and *mdtA* AMR genes. Based on COG results, the  
34 functions of defense, transcription and replication, recombination and repair were  
35 enhanced in unique genes, whereas functions of translation, ribosomal structure and  
36 biogenesis were enhanced in core genes. The KEGG functional categories enriched in  
37 unique genes included human disease and membrane transport, whereas COG  
38 functional categories enriched in core genes included energy metabolism, nucleotide  
39 metabolism and translation. No gene was significantly associated with host specificity.  
40 In addition, core genome SNPs analysis suggested potential host adaptation of some

41 isolates in several sequence types. Therefore, this study characterized *L. garvieae*  
42 isolated from mastitis and assessed host adaptation of *L. garvieae* to various hosts.

43 **IMPORTANCE** This study provides important insights on bovine mastitis key topic  
44 pathogen *Lactococcus garvieae*, which constitutes mastitis concerns. However,  
45 comprehensive genomic analyses of *L. garvieae* from dairy farms have not been  
46 performed. This study gives a detailed and comprehensive novel feature in *L. garvieae*,  
47 an important but poorly characterized bacterium, recovered in the past 5 years in 6  
48 Chinese provinces. We documented diverse contributory genetic processes, including  
49 predominant sequence type ST46 and 13 novel MLST types. *L. garvieae* had 6310  
50 genes, including 1015, 3641 and 1654 core, accessory and unique genes. All isolates  
51 had virulence genes coding for collagenase, fibronectin-binding protein,  
52 Glyceraldehyde-3-phosphate dehydrogenase, superoxide dismutase and NADH  
53 oxidase, and resistant to chloramphenicol and clindamycin. Most isolates had *lsaD* and  
54 *mdtA* antimicrobial resistance genes. No gene was significantly associated with host  
55 specificity. This is the first absolute quantification of *L. garvieae* isolated from mastitis  
56 and identified host adaptation of *L. garvieae* to various hosts.

57 **KEYWORDS** bovine mastitis, *Lactococcus garvieae*, population structure, virulence  
58 genes, antimicrobial resistance, host adaptation

## 59 INTRODUCTION

60 Bovine mastitis is a prevalent and costly disease on dairy farms worldwide (1, 2). It is a  
61 multifactorial disease, often caused by bacteria (2). Bacterial pathogens associated with  
62 bovine mastitis are broadly classified as major (*Staphylococcus aureus*, *Escherichia*  
63 *coli*, *Streptococcus agalactiae*, *Streptococcus dysgalactiae*, *Streptococcus uberis*,  
64 *Enterococcus* spp. etc.) and minor pathogens (Non-*aureus Staphylococci* spp.,  
65 *Lactococcus* spp., *Corynebacterium* spp., etc.) (3). Most studies have focused on major  
66 pathogens, with only limited studies of minor pathogens.

67 *Lactococcus garvieae* is a zoonotic pathogen reported to cause infections in fish (4)  
68 and humans (5–8). It is also considered a minor pathogen for bovine mastitis, with  
69 transmission attributed to environmental reservoirs (2). There are limited reports on  
70 bovine mastitis caused by *L. garvieae* (9–15), primarily descriptive studies of  
71 phenotypes or genotypes. However, detailed whole genome characterization of *L.*  
72 *garvieae* associated with bovine mastitis is lacking.

73 Predominant strain types of mastitis pathogens have been described for various  
74 pathogens (16–20). Elucidating population structure and diversity of mastitis pathogens  
75 informs evidence-based mastitis control programs that target those prevalent strain  
76 types.

77 Bacterial pathogenicity is primarily determined by virulence factors; some  
78 facilitate adhesion and invasion, whereas antimicrobial resistance, particularly  
79 multi-drug resistance, is an important threat to public health (21). For *L. garvieae*,

80 several virulence factors and antimicrobial resistance genes were identified using  
81 traditional methods (e.g., PCR) targeted at specific virulence genes (22–24). However,  
82 a comprehensive profiling of its virulence and antimicrobial resistance genes are  
83 lacking.

84 Host adaptation of bovine mastitis associated pathogens have been reported for  
85 *Staphylococcus aureus* (25) and *Streptococcus agalactiae* (26). Infections caused by *L.*  
86 *garvieae* in humans, fish and cattle have been reported, but potential host adaptation of  
87 *L. garvieae* has not been studied. Therefore, our objectives were to: 1) resolve the  
88 population structure; 2) identify virulence genes and antimicrobial resistance genes;  
89 and 3) determine genes associated with host specificity.

90

## 91 **RESULTS**

92 A total of 39 *L. garvieae* isolates from 2899 clinical mastitis composite milk samples  
93 collected from 13 large dairy farms in 6 provinces in Northern China from April 2017  
94 to September 2021. Detailed information of these isolates is provided in **Table 1**.

95 **MLST and Minimum Spanning Tree.** MLST analysis assigned the 86 *L.*  
96 *garvieae* isolates into 32 STs (**Table 2**), of which 13 were novel STs: ST46 to ST58.  
97 The most common sequence type was ST46 (n = 13), followed by ST48 (n = 9). The 32  
98 STs were grouped into 5 CCs and 18 singletons: ST 3, 4, 13 and 38 into CC 1; ST 16  
99 and 17 into CC 2; ST 10, 12, 21 and 35 into CC 3; ST 49 and 52 into CC4; and ST 47  
100 and 50 into CC 5 (**Fig. 1**). Among the 39 isolates, 6 and 9 isolates formed clonal

101 complex CC4 and CC5, respectively, whereas, the remaining 24 isolates were  
102 singletons.

103 **Antimicrobial Resistance Profile and Genes.** Antimicrobial resistance patterns  
104 of *L. garvieae* are listed in **Table 3**. All isolates were resistant to chloramphenicol and  
105 clindamycin. There were also high resistance rates for amikacin (90%), cefpodoxime  
106 (82.5%), cefazolin (45%), and gentamicin (37.5%), whereas few isolates (5%) were  
107 resistant to erythromycin. Meanwhile, all isolates were susceptible to penicillin,  
108 ampicillin, amoxicillin-clavulanic acid, imipenem, ceftiofur, enrofloxacin and  
109 marbofloxacin. Regarding multidrug resistance, there were 5, 14, 12, 6, 2 and 1 isolates  
110 resistant to 3, 4, 5, 6, 7, and 8 antimicrobials, respectively.

111 Distribution of antimicrobial resistance (AMR) genes with country, host and clonal  
112 complex information are presented in **Fig. 2**. The most common genotypic AMR  
113 markers were: (i) multidrug protein first reported in *L. garvieae*, represented by the  
114 *lsaD* gene (97% of isolates); (ii) resistance-nodulation-cell division antibiotic efflux  
115 pump, represented by the *mdtA* gene (97% isolates); and (iii) tetracycline-resistant  
116 ribosomal protection protein, coded by *tetS* gene (14 isolates, including 12 from current  
117 bovine samples). Other tetracycline-resistant genes, *tetL* and *tetM*, were identified in  
118 only 3 isolates. Three isolates, namely LG728, LG791 and MGYG-HGUT-00230,  
119 harbored the most abundant AMR genes, the gene number of which was 14, 7, 5  
120 respectively. Genes *cat*, *dfrG*, *ermA* and *lunD* were only present in LG728, and gene  
121 *lnuD* was only in MGYG-HGUT-00230. Genes *ermB*, *fexA* and *optrA* were present in

122 LG728 and LG791. Genes *acc(6')-aaph(2'')* and *ant(6)-la* were identified in LG728  
123 and MGYG-HGUT-00230. However, no AMR genes were detected in 3 isolates that  
124 belonged to ST18: A1, DCC43 and FDAARGOS\_893.

125 **Virulence Genes.** The occurrence and distribution of putative virulence genes are  
126 shown in **Fig. 3**. The putative virulence factors were classified into 5 functional  
127 categories: toxin, iron uptake, capsule formation, adherence, and enzyme.

128 Among the 3 toxin-related genes, *hyl-II* was present in all isolates, whereas *hyl-I*  
129 and *hyl-III* were absent in ST18 only (represented by 3 isolates: A1, DCC43 and  
130 FDAARGOS\_893). Nine iron uptake genes (*fepB*, *fepC*, *fepD*, *fecB*, *fecC*, *fecD*, *fecE*,  
131 *feoA*, and *feoB*) were detected in > 81 isolates. In contrast, *fecE* was absent only in  
132 EP01. However, *fecB* was absent in EP01 and FDAARGOS\_893. *fecD*, *feoA* *feoB*, *fepB*,  
133 *fepC* and *fepD* were absent in 4 isolates: A1, EP01, DCC43 and FDAARGOS\_893.  
134 Furthermore, *fecC* was absent in 5 isolates: A1, EP01, DCC43, FDAARGOS\_893 plus  
135 FDAARGOS\_1063. With respect to the 9 adherence-associated virulence factors,  
136 *adhPavA* and putative collagenase were identified in all isolates. The gene *adhPsaA*  
137 was absent in the same 4 isolates above (A1, EP01, DCC43 and FDAARGOS\_893),  
138 whereas *Adhesin* was detected in 22 isolates. Genes expressing LPxTG proteins  
139 (LPxTG-1, LPxTG-2, LPxTG-3, LPxTG-4, LPxTG-5, and LPxTG-6) were in 4 to 43%  
140 of isolates. Six enzyme-related virulence factors were detected in almost all isolates,  
141 although *eno* and *srtA* were exclusively absent from 2 (MGBC116427 and UBA11300)  
142 and 4 isolates (A1, EP01, DCC43 and FDAARGOS\_893). Regarding 16 genes

143 encoding for the capsule gene cluster, the number of gene presented in isolates varied  
144 from 0 to 16. Lg2 and JJN1 were identified with all 16 genes, whereas 47 isolates had  
145 0 genes.

146 Co-occurrence of virulence genes was visualized in **Fig. 4**, where each box had a  
147 phi coefficient value. A phi value of 1.0 indicates a perfect positive relationship  
148 between the 2 variables, whereas values  $> 0.7$  indicates a fair positive relationship.  
149 Most associations among virulence genes were very weak. However, there were  
150 strongly positive correlations between 8 genes, including *adhPsaA*, *srtA* and 6 iron  
151 uptake genes (*fecD*, *feoA*, *feoB*, *fepB*, *fepC* and *fepD*). In addition, toxin-related genes  
152 hyl-I and -3 were also strongly positively associated with each other and those 8 genes.  
153 Furthermore, *fecC* was strongly positively associated with hyl-I, hyl-III and the 8 genes.  
154 LPxTG-4 was strongly positively associated with *Adhesin*, whereas *fecB* had strong  
155 associations with the 8 genes. However, there were no strong negative associations  
156 among the presence of virulence genes.

157 **Pan-Genome Analyses.** The pan-genome of 86 *L. garvieae* isolates tested in this  
158 study had 6310 genes. The core genome (shared by 100% isolates) consisted of 1015  
159 genes. The accessory genome (genes in  $>2$  isolates but not in all) consisted of 3641  
160 genes, and the unique genome was composed of 1654 genes. According to BPGA's  
161 calculation, the pan genome was open but approached convergence (**Fig. 4A**).  
162 Functional annotation of genes in the pan-genome performed using the COG and  
163 KEGG databases revealed a distribution of functional categories among 3 pan-genome



164 sets (**Fig. 4B, 4C and 4D**). The functions of defense mechanisms, transcription and  
165 replication, recombination and repair were enhanced in unique genes, whereas the  
166 functions of translation, ribosomal structure and biogenesis were enhanced in core  
167 genes in KEGG functional pathways (**Fig. 4B**). The COG functional categories  
168 enriched in the unique genome included human disease and membrane transport (**Fig.**  
169 **4C**). By contrast, COG categories enriched in the core genome included energy  
170 metabolism, nucleotide metabolism and translation (**Fig. 4D**).

171 **Phylogenetic Analyses.** A phylogenetic tree was constructed based on the core  
172 genes of 86 *L. garvieae* genomes (**Fig. 5**). The longer the branch, the more distant the  
173 evolutionary relationship. All trees had 3 clades that contained 4, 38 and 44 isolates  
174 respectively. All local isolates except Hebei-B-22 were in the same clades. EP01 was  
175 phylogenetically distant from the others. There were signs of host adaptation, which  
176 consisted of isolates from various hosts.

177 Phylogenetic tree based on 16s rRNA (**Fig. 5A**) were similar to that using the core  
178 genes with minor differences. For example, LG9 was assigned to clade A in core gene  
179 based phylogenetic tree but in clade B in 16S rRNA based phylogenetic tree.

180 Both trees corresponded well with STs and CCs predicted by GrapeTree analysis.  
181 For core gene based phylogenetic tree (**Fig. 5B**), all isolates that belonged to the same  
182 CC were grouped in the same cluster, except 2 isolates (LG9 and IBB3403) in the 16S  
183 rRNA-based phylogenetic tree.

184 **Pan-Genome-Wide Association Analyses.** No significant association was  
185 detected between genes and either country or host.

186 **Core-genome SNPs Analyses.** The core-genome single nucleotide  
187 polymorphism (SNPs) based phylogenetic tree with metadata annotation is displayed in  
188 **Fig. 6.** The numbers of core-genome SNPs among 86 isolates are provided in  
189 Supplementary **Table S1.** Several isolates from various hosts were phylogenetically  
190 closely related in core SNPs. For example, the number of SNPs between isolates within  
191 the same MLST but a different host were: DM12426 (human) and CT2 (fish) was 0,  
192 1001287H\_170206\_H11 (human) and UBA5784 (metal) was 5,  
193 Lg-ilsanpaik-gs201105 (human) and Hebei-B-22 (cow) was 11, 21881 (human) and  
194 M14 (cow) was 105, which indicates potential host adaptation in *L. garvieae*.

195 **Associations between the Co-occurrence of Virulence Genes.** Co-occurrence  
196 of virulence genes was visualized in **Fig. 7.** SortaseA, LPxTG-6, and adhesin PsaA  
197 was in co-occurrence with *fecB*, *fecC*, *fecD*, *feoA*, *feoB*, *fepB*, *fepC*, *fepD*, *hemolysin I*,  
198 and *hemolysin III*.

199

## 200 **DISCUSSION**

201 Although *L. garvieae* was first isolated as a causative agent of bovine mastitis (27),  
202 most reports have focused more on the epidemiology of fish and human cases. In  
203 addition, many studies used sequencing to investigate genotypic characteristics of *L.*  
204 *garvieae* isolates (8, 28–40). Therefore, we collected 39 *L. garvieae* isolates from

205 bovine mastitis in China and conducted comparative genome sequence analysis of *L.*  
206 *garvieae*.

207 The prevalence of *L. garvieae* from clinical mastitis sample was 1.35% during  
208 2017-2021, which increased from 0% in 2017 to 4.10% in 2020 in China. That *L.*  
209 *garvieae* has been misclassified into *Streptococcus spp.* (41) has resulted in  
210 underreporting of *L. garvieae*. Similarly, the true incidence of human infective  
211 endocarditis is difficult to assess due to misidentification with other gram-positive  
212 cocci (42). This is the first report regarding the prevalence of *L. garvieae* in Chinese  
213 dairy herds.

214 The MLST analysis clustered 86 *L. garvieae* isolates into 32 distinct STs, with 5  
215 CCs and 18 singletons, which is consistent with the population structure in isolates  
216 from other hosts (37, 38, 43), the environment, or foods (44). All strains, except  
217 Hebei-B-22, were new STs and phylogenetically close to each other. However, they  
218 were distant from isolates of bovine mastitis in other countries, which might indicate  
219 geographic effects on the phylogeny. Meanwhile, new STs profiles are comprised of  
220 new alleles in gene loci (e.g., *als*, *gyrB* and *galP*), perhaps due to a different evolution  
221 rate of those loci (38).

222 Understanding phylogenetic relationships between strains is important for  
223 characterizing pathogen transmission. In this study, 3 phylogenetic trees were  
224 constructed using core genes and core genome SNPs as well as 16S rRNA, respectively.  
225 Core-genes tree and 16S rRNA trees produced similar clades but 16S rRNA failed to

226 resolve relationships toward tree tips. Furthermore, a core-gene tree is in line with  
227 MLST and CC. This was not surprising, as 16S rRNA tree is based on only 1 gene,  
228 representing only a very small portion of the whole genome. Therefore, many studies  
229 recommended core genes for inferring phylogenies (45, 46).

230 Although pathogenicity of *L. garvieae* is poorly understood, some mechanisms  
231 have been determined, including presence of a capsule, hemolytic activity via secreted  
232 proteins (47) and production of siderophores (48). Capsulated *L. garvieae* Lg2 was  
233 more virulent in fish than the non-capsulated isolate ATCC 49156 (49). The capsule  
234 gene cluster, located in a genomic island, were identified in Lg2 but absent in  
235 ATCC49156, which could be crucial for virulence of *L. garvieae* in fish (40).  
236 However, existence of the capsule gene cluster has not been detected in all clinical fish  
237 isolates from Japan, Spain, Italy, France, Turkey (22), USA (39), or India (50), nor in  
238 any human isolates (31, 69). In this study, only 2 of 86 isolates had the complete  
239 capsule gene cluster, which confirmed that it was not essential for virulence.

240 Proteases are among the important virulence factors causing rapid and extensive  
241 destruction of host tissue. For example, enolase (50) can cleave an extracellular  
242 proteinaceous matrix and therefore break a host's structural barrier during  
243 colonization. Hemolysin genes might act with secreted proteases to promote host  
244 tissue destruction. Genes encoding biosynthesis of iron uptake may be involved in  
245 iron acquisition during host colonization (48). LPxTG protein (Leu-Pro-any-Thr-Gly),  
246 an important virulence factor in *L. garvieae*, binds to the peptidoglycan of cell wall by

247 transpeptidase enzymes called sortases (40). In a previous study, *L. garvieae* strain  
248 isolated from rainbow trout colonized non-phagocytic cells with the help of LPxTG  
249 proteins (51). LPxTG proteins and sortases have important roles binding pathogenic  
250 bacteria to their host. In this study, genes coding for adhesin, proteases, hemolysin,  
251 iron uptake and LPxTG protein were detected in most or all isolates. Strong positive  
252 associations within LPxTG-4, *adhPsaA*, *srtA* and iron uptake genes suggest they might  
253 act together to promote host tissue destruction and colonization. Gene *pgm*, identified  
254 in all isolates, produces protein with an important role in antibody production (52).

255 The minimum inhibitory concentrations (MIC) results were consistent with reports  
256 that *L. garvieae* isolates from dairy farms were susceptible to penicillin, ampicillin and  
257 amoxicillin-clavulanic acid, imipenem, ceftiofur, enrofloxacin, vancomycin, and  
258 marbofloxacin (10, 53). However, compared to a previous report (10), there were  
259 variable degrees of increasing resistant rates for 8 antibiotics, including clindamycin  
260 (93.6 to 100%), chloramphenicol (6.4 to 100%), amikacin (2.1 to 90%), cefpodoxime  
261 (0 to 82.5%), cephalothin (0 to 10%), cefazolin (40.4 to 45%), gentamicin (0 to 37.5%),  
262 and erythromycin (0 to 5%). High resistance of clindamycin has been described as  
263 intrinsic for *L. garvieae* and proposed as a selection criterion to distinguish between *L.*  
264 *garvieae* and *L. lactis* (54). The *lsaD* gene, identified in most isolates (83/86), could be  
265 responsible for intrinsic resistance. *lsaD* is a novel lsa-type family gene detected in  
266 lincomycin-resistant strains isolated from fish (55). The lsa-type genes are responsible  
267 for cross-resistance to lincosamides, streptogramins or pleuromutilins (hereinafter

268 referred to as LSA(P)-resistant phenotype), by coding ATP-binding cassette F  
269 proteins in Gram-positive pathogens including Staphylococci, (56) Streptococci (57),  
270 enterococci (58), and lactococci (55). Increasing resistance against cephalosporins  
271 might be related to increasing use of these antibiotics for treatment of infectious  
272 diseases on Chinese dairy farms (59). The multidrug transporter, *mdtA* is another AMR  
273 gene present in most isolates. This gene originally conferred resistance to macrolides,  
274 lincosamides, streptogramins and tetracycline in *L. lactis* (60), but mutations present  
275 in the C-motifs of *mdtA* from *L. garvieae* confer susceptibility to erythromycin and  
276 tetracycline (53). Furthermore, all 39 isolates with *mdtA* had a limited resistance rate  
277 to erythromycin (5%). Some isolates (16/86) harbor the *tetS* gene, including 10 local  
278 isolates. Three isolates from the human gut in China, LG729, LG729 and  
279 MGYG-HGUT-00230, contained the most abundant AMR genes. Notably, 9 AMR  
280 gene were only present in the 3 isolates, including *cat*, *dfrG*, *ermA*, *ermB*, *lund*, *fexA*,  
281 *optrA*, *acc(6')-aaph(2'')* and *ant(6)-Ia*. The *optrA* gene, first identified in enterococci,  
282 has been reported in *Staphylococci*, and *Streptococci*, *Clostridium perfringens* and  
283 *Campylobacter coli*; it confers resistance to oxazolidinones and phenicol and has  
284 identified on a plasmid of *L. garvieae* (61). The spread of antibiotic resistance genes in  
285 bacterial populations is aided by various mechanisms of horizontal gene transfer, with  
286 plasmid-mediated transfer being the main mechanism for transmission of resistance  
287 genes (62). Horizontal gene transfer between bacteria is largely mediated by  
288 specialized mobile genetic elements, including plasmids, bacteriophages, transposon,

289 insert sequences (IS), intergon, etc., and has been reported in *L. garvieae*. Both *tetS*  
290 and *tetM* were associated with conjugative transposon-associated gene in isolates  
291 from healthy fish intestines (63). Most of the IS in *L. garvieae* had substantial  
292 homology to *Lactococcus lactis* elements, implying movement of IS between these 2  
293 species that are phylogenetically closely related (64, 65). That these 9 AMR genes  
294 were only reported in humans does not support the assertion that AMR genes are  
295 transferred to humans from fish or dairy products. Regardless, *L. garvieae* could be a  
296 reservoir for antibiotic resistance genes for other bacteria.

297 In this study, no genes were associated with host specificity, consistent with the  
298 phylogenetic analysis and the core-genome SNP analysis that host adaptation occurs in  
299 *L. garvieae* isolates. Previous research (5) summarized human *L. garvieae* infections  
300 associated with consumption of raw fish, seafood, or unpasteurized milk. The core  
301 genome SNP analysis underlies the potential host adaptation of *L. garvieae*. Meanwhile,  
302 adhesins, haemolysin, fibronectin-binding proteins, penicillin acylase and WxL  
303 domain-containing proteins are considered to actively promote bacterial colonization  
304 (66); most had high similarity across host in those coding sequences. Regardless,  
305 underlying mechanisms remain unclear. Consequently, further studies are needed to  
306 determine host adaptation mechanisms of *L. garvieae*.

307

308 **CONCLUSIONS**

309 This was apparently the first study on comparative genomic analyses of *L. garvieae*  
310 isolates from mastitis cows in China. The incidence of *L. garvieae* mastitis was 1.35%  
311 in China. Most isolates (38/39) were novel sequence types, 3 antimicrobial resistance  
312 genes (*mdtA*, *lsaD* and *tetS*) were identified and there was evidence of host adaptation  
313 in these isolates.

314

## 315 MATERIALS AND METHODS

316 **Statement of Ethics.** This study was conducted in accordance with ethical  
317 guidelines and standard biosecurity and institutional safety procedures of China  
318 Agricultural University (CAU; Beijing, China). Ethical approval was not needed, as no  
319 animal study was involved.

320 **Sample Collection and Bacteria Identification.** Milk samples from clinical  
321 cases of mastitis were collected aseptically from dairy cows on Chinese dairy farms and  
322 sent to the Mastitis Diagnostic Laboratory at the College of Veterinary Medicine, CAU,  
323 Beijing, China. Pathogens were identified by bacteriological culture, colony  
324 morphology and 16S rRNA sequencing according to NMC guidelines (67). In brief, 50  
325  $\mu$ l milk was spread on tryptone soy agar with 5% defibrinated sheep blood. The plate  
326 was incubated aerobically at 37 °C for 24 h. Bacterial colony morphology was recorded;  
327 samples with  $\geq 3$  morphologically distinct colonies were considered contaminated and  
328 excluded from subsequent analyses.



329           **Antimicrobial Susceptibility Testing.** For all 39 *L. garvieae* isolates, MIC of 15  
330 antimicrobials (Chinese National Institutes for Food and Drug Control, Beijing, China),  
331 commonly used to treat clinical mastitis in China, were determined by the microbroth  
332 dilution method, according to the Clinical and Laboratory Standards Institute (CLSI)  
333 guidelines VET01-A4 (CLSI, 2013), with reported breakpoints (10). *Staphylococcus*  
334 *aureus* ATCC 29213 was used as the quality control strain.

335           **Genome Assembly and Annotation.** Genomic DNA of putative isolates was  
336 extracted using a bacterial DNA extraction kit (TransGen Biotech, Beijing, China)  
337 according to the manufacturer's instruction. Extracted DNA was quantified with a  
338 NanoDrop One spectrophotometer (Thermo Fisher Scientific, Waltham, MA, USA)  
339 prior to 16S rRNA gene sequencing (Beijing Sunbiotech Inc., Beijing, China). Whole  
340 genome DNA was paired-end sequenced ( $2 \times 150$  bp) using Illumina NovaSeq 6000  
341 (Illumina, San Diego, CA, USA) at Shanghai Personal Biotechnology Co., Ltd  
342 (Shanghai, China). For raw reads, quality control was done with FastQC Version 0.11.9  
343 (<https://github.com/s-andrews/FastQC>). Low quality bases were trimmed using fastp  
344 Version 0.20.1 (<https://github.com/OpenGene/fastp>) with default settings. Quality  
345 trimmed reads were assembled into scaffolds using SPades Version 3.13.1  
346 (<https://github.com/ablab/spades>) with auto coverage cut-off and shovill Version 1.1.0  
347 (<https://github.com/tseemann/shovill>) with default settings. Thereafter, 2 assembled  
348 scaffolds for each isolate were obtained, and a draft genome of each isolate was  
349 selected using Quast Version 5.0.2 (<https://github.com/ablab/quast>) with N50, L50

350 from the above-mentioned 2 assembled scaffolds. Assembly completeness was  
351 assessed using Busco Version 5.2.2 (<https://github.com/WenchaoLin/BUSCO-Mod>)  
352 with reference to lineage lactobacillales\_odb10. Only genomes with completion  $\geq 95\%$   
353 were considered “high-quality draft genome” and were included in further analyses  
354 (68). In addition, whole genome sequence assemblies fasta files of 51 *L. garvieae*  
355 (accessed on March 24, 2022) were downloaded from NCBI. To ensure high-quality  
356 genomes, all genomes were analyzed by BusCom Version 5.2.2 (lineage  
357 lactobacillales\_odb10) and 3 assemblies were excluded from subsequent analysis. There  
358 were 3 ATCC 49156 assemblies; we chose the 1 with the highest assembly level.  
359 Therefore, a total of 39 isolates from composite (or quarter) milk samples and 47  
360 assemblies from NCBI were obtained in the subsequent genome annotation and  
361 pan-genome analysis. Annotation of the genome was performed using Prokka Version  
362 1.14.6 (<https://github.com/tseemann/prokka>) with default settings. MLST analyses  
363 Multilocus sequence typing (MLST) using whole genome sequences was performed to  
364 determine sequence types (ST) of the 86 isolates. A *L. garvieae* MLST database was  
365 constructed based on reported datasets (69) as there was no publicly available MLST  
366 scheme for *L. garvieae*. Similarly, the database was integrated into ABRicate local  
367 database, and we aligned the 86 *L. garvieae* genomes against the dataset by ABRicate.  
368 Sequence types were assigned to new allele patterns and added to the existing MLST  
369 scheme for *L. garvieae* constructed by (69). Clonal complex (CC) was defined as a  
370 group of STs in which every ST shared at least 5 of 7 identical allele profiles with at

371 least 1 other ST in the group. The minimum spanning tree (MST) was constructed by  
372 the goeBURST algorithm and visualized with the PhyloViz web server  
373 (<https://online.phyloviz.net/index>) to infer phylogenetic relationships among STs.

#### 374 **Identification of Antimicrobial Resistance Genes and Virulence Factors.**

375 Antimicrobial resistance genes were identified by blasting *L. garvieae* genomes against  
376 ResFinder database via Resfinder Version 4.1.11  
377 (<https://cge.cbs.dtu.dk/services/ResFinder/>) and The Comprehensive Antibiotic  
378 Resistance Database (<https://card.mcmaster.ca/>) via RGI Version 5.2.1  
379 (<https://github.com/arpcard/rgi>). A set of virulence genes of *L. garvieae* was  
380 summarized from previous reports (22, 69, 70); they included haemolysin I, II and III  
381 (*hlyI*, *-II* and *-III*), iron uptake genes (*fepB*, *fepC*, *fepD*, *fecB*, *fecC*, *fecD*, *fecE*, *feoA*, and  
382 *feoB*), capsule gene cluster (CGC), adhesions (*adh*, *adhPavA*, *adhPsaA*), putative  
383 collagenase (*colA*), LPxTG surface proteins 1, 2, 3, 4, 5, 6 (LPxTG-1, LPxTG-2,  
384 LPxTG-3, LPxTG-4, LPxTG-5 and LPxTG-6) and enzyme-related virulence factors  
385 NADH oxidase (*Nox*), glyceraldehyde-3-phosphate dehydrogenase (GAPDH),  
386 phosphoglucomutase (*Pgm*), superoxide dismutase (*Sod*), enolase (*Eno*) and SortaseA  
387 (*srtA*). The database was integrated into the ABRicate local database. We blasted the 86  
388 (39 from our study and 47 from NCBI) *L. garvieae* genomes against the database using  
389 ABRicate to determine virulence genes. The presence of antimicrobial resistance or  
390 virulence gene was defined using the cut-off value of 80% sequence coverage and 80%  
391 nucleotide identity (ABRicate default settings).

392       **Pan-genome Analyses.** The pan-genome of 86 *L. garvieae* isolates was computed  
393 using BPGA Version 1.3 (<https://iicb.res.in/bpga/>) with USEARCH algorithm to  
394 cluster orthologous gene families using faa files of local isolates produced by Prokka  
395 and retrieved from NCBI directly. For BPGA analysis, a core gene was defined as a  
396 gene present in all the genomes; an accessory gene was present in > 1 genome but not  
397 all genomes; and a unique gene was only present in a single genome. Functional  
398 annotations of core, accessory, and unique genes were obtained after comparing  
399 sequences to COG and KEGG databases incorporated in BPGA Version 1.3.

400       **Phylogenetic Analyses.** A 16S rRNA phylogenetic tree was constructed based on  
401 16s rRNA genes. In addition, we also constructed another phylogenetic tree using  
402 alignment of core genes produced by BPGA. For 16S rRNA phylogenetic analysis,  
403 Barrnap Version 0.9 (<https://github.com/tseemann/barrnap>) was used to extract 16S  
404 rRNA gene from the whole genome sequence. The 16S rRNA gene sequences were  
405 edited and aligned using MAFFT multiple sequence alignment algorithm (stargety  
406 “L-IINS-I”; <https://github.com/GSLBiotech/mafft>). Maximum-likelihood (ML) trees  
407 based on this alignment were constructed using FastTree Version 2.1  
408 (<https://github.com/PavelTorgashov/FastTree>). Visualization of the phylogenetic tree  
409 was performed using iTOL (<https://itol.embl.de/>) with metadata (clonal complex,  
410 source of host and country) of the isolates.

411       **Pan-genome Wide Association Analyses.** To identify genes potentially  
412 associated with traits, such as host, clonal complex, and country, we performed

413 pan-genome wide association analysis using Scoary. Annotation of whole genome  
414 sequences of the 86 *L. garvieae* isolates were performed using Prokka Version 1.14.6  
415 (<https://github.com/tseemann/prokka>), and the resultant gff files were used for  
416 pan-genome analysis with Roary Version 3.13.0  
417 (<http://sanger-pathogens.github.io/Roary/>) to produce gene presence and absence data.  
418 Thereafter, genes associated with host, country, ST or clonal complex were identified  
419 with Scoary VVersion 1.6.16 (<https://github.com/AdmiralenOla/Scoary>). Categorical  
420 traits were dichotomized prior to pan-genome wide association analysis with Scoary.

421 **Core-genome SNPs Analyses.** In addition to pan-genome wide association  
422 analyses, we also performed core-genome SNPs analyses. Core genome alignment and  
423 single nucleotide polymorphism (SNP) were detected for all 86 genome sequences  
424 using parsnp Version 1.7.2 (<https://github.com/marbl/parsnp>). Meanwhile, the exact  
425 numbers of SNPs among genomes from various hosts in the same MLST group and  
426 closely related in core-gene based phylogenetic tree were determined with snp-dists  
427 Version 0.8.2 (<http://sanger-pathogens.github.io/snp-sites/>) using the sequence  
428 alignment file produced from parsnp. Phylogenetic tree based on core genome SNPs  
429 was annotated with iTOL.

430 **Associations between the Co-occurrence of Virulence Genes.** Co-occurrence of  
431 virulence genes was determined with phi coefficient using the Phi function in psych  
432 package Version 2.2.5 (<https://cran.r-project.org/web/packages/psych/>) with R Version  
433 4.1.3 (<https://www.r-project.org/>) and  $P < 0.05$  was considered significant in a 2-tailed

434 test. The pair-wised phi coefficients between the presences of virulence genes were  
435 visualized using ggplot2 Version 3.3.6  
436 (<https://cran.r-project.org/web/packages/ggplot2/>).

437 **Data Availability.** All whole genome sequence data used in this study are  
438 available without restriction from NCBI under BioProject no. PRJNA848370.

439

#### 440 **ACKNOWLEDGMENTS**

441 This study was supported financially by the following: National Natural Science  
442 Foundation of China (No. 32172928), the High-End Foreign Experts Recruitment  
443 Program (No. 110000202720220022), and Beijing Municipal Natural Science  
444 Foundation (No. 6222031).

445 B.H. and Y.L. designed and supervised the study. Y.L., J.H., Y.W., J.G. and S.Q.  
446 performed the experiments, and wrote the manuscript. Z.D. and H.W.B. assisted in the  
447 analyses and re-edited the manuscript. B.H., J.P. K. and H.W.B. revised the manuscript.  
448 All authors read and approved the final manuscript.

449 The authors declare that the research was conducted in the absence of any commercial  
450 or financial relationships that could be construed as a potential conflict of interest.

451

#### 452 **SUPPLEMENTAL MATERIAL**

453 Supplemental material is available online only. **Table S1.xlsx** file, 45 KB.

454   **REFERENCES**

- 455   1. Barkema HW, von Keyserlingk MAG, Kastelic JP, Lam TJGM, Luby C, Roy J-P,  
456       LeBlanc SJ, Keefe GP, Kelton DF. 2015. Invited review: Changes in the dairy  
457       industry affecting dairy cattle health and welfare. *J Dairy Sci* 98:7426–7445.
- 458   2. Ruegg PL. 2017. A 100-year review: Mastitis detection, management, and  
459       prevention. *J Dairy Sci* 100:10381–10397.
- 460   3. Acharya KR, Brankston G, Slavic D, Greer AL. 2021. Spatio-temporal variation in  
461       the prevalence of major mastitis pathogens isolated from bovine milk samples  
462       between 2008 and 2017 in Ontario, Canada. *Front Vet Sci* 8:1–12.
- 463   4. Meyburgh CM, Bragg RR, Boucher CE. 2017. *Lactococcus garvieae*: an emerging  
464       bacterial pathogen of fish. *Dis Aquat Organ* 123:67–79.
- 465   5. Gibello A, Galán-Sánchez F, Blanco MM, Rodríguez-Iglesias M, Domínguez L,  
466       Fernández-Garayzábal JF. 2016. The zoonotic potential of *Lactococcus garvieae*:  
467       An overview on microbiology, epidemiology, virulence factors and relationship  
468       with its presence in foods. *Res Vet Sci* 109:59–70.
- 469   6. Choksi TT, Dadani F. 2017. Reviewing the Emergence of *Lactococcus garvieae*: A  
470       case of catheter associated urinary tract infection caused by *Lactococcus garvieae*  
471       and *Escherichia coli* coinfection. *Case Rep Infect Dis* 2017:5921865.
- 472   7. González-Bravo DH, Alegre-Boschetti S, Silva-Cantillo R, Mercado-Maldonado J,  
473       Ramos-Márquez R, Torres-Rivera G, Cortés C, Mercado-Crespo J. 2021.  
474       *Lactococcus garvieae*: An uncommon human pathogen causing infective

- 475           endocarditis in a valve-in-valve transcatheter aortic valve replacement. *Case*  
476           *Reports Cardiol* 2021:5569533.
- 477    8. Francés-Cuesta C, Ansari I, Fernández-Garayzábal JF, Gibello A,  
478           González-Candelas F. 2022. Comparative genomics and evolutionary analysis of  
479           *Lactococcus garvieae* isolated from human endocarditis. *Microb Genomics* 8:  
480           000771.
- 481    9. Tejedor JL, Vela AI, Gibello A, Casamayor A, Domínguez L, Fernández-Garayzábal  
482           JF. 2011. A genetic comparison of pig, cow and trout isolates of *Lactococcus*  
483           *garvieae* by PFGE analysis. *Lett Appl Microbiol* 53:614–619.
- 484    10. Plumed-Ferrer C, Barberio A, Franklin-Guild R, Werner B, McDonough P, Bennett  
485           J, Gioia G, Rota N, Welcome F, Nydam D V, Moroni P. 2015. Antimicrobial  
486           susceptibilities and random amplified polymorphic DNA-PCR fingerprint  
487           characterization of *Lactococcus lactis* ssp. *lactis* and *Lactococcus garvieae*  
488           isolated from bovine intramammary infections. *J Dairy Sci* 98:6216–6225.
- 489    11. Eraclio G, Ricci G, Moroni P, Santisteban C, Plumed-Ferrer C, Bennett J, Fortina  
490           MG. 2019. Sand bedding as a reservoir for *Lactococcus garvieae* dissemination in  
491           dairy farms. *Can J Microbiol* 65:84–89.
- 492    12. Scillieri Smith JC, Moroni P, Santisteban CG, Rauch BJ, Ospina PA, Nydam D V.  
493           2020. Distribution of *Lactococcus* spp. in New York State dairy farms and the  
494           association of somatic cell count resolution and bacteriological cure in clinical  
495           mastitis samples. *J Dairy Sci* 103:1785–1794.



- 496 13. Song X, Huang X, Xu H, Zhang C, Chen S, Liu F, Guan S, Zhang S, Zhu K, Wu C.  
497 2020. The prevalence of pathogens causing bovine mastitis and their associated  
498 risk factors in 15 large dairy farms in China: An observational study. *Vet*  
499 *Microbiol* 247:108757.
- 500 14. Rowe SM, Godden SM, Royster E, Timmerman J, Boyle M. 2021. Postcalving  
501 udder health and productivity in cows approaching dry-off with intramammary  
502 infections caused by non-aureus *Staphylococcus*, *Aerococcus*, *Enterococcus*,  
503 *Lactococcus*, and *Streptococcus* species. *J Dairy Sci* 104:6061–6079.
- 504 15. de Oliveira RP, Aragão BB, de Melo RPB, da Silva DMS, de Carvalho RG, Juliano  
505 MA, Farias MPO, de Lira NSC, Mota RA. 2022. Bovine mastitis in northeastern  
506 Brazil: Occurrence of emergent bacteria and their phenotypic and genotypic  
507 profile of antimicrobial resistance. *Comp Immunol Microbiol Infect Dis*  
508 85:101802.
- 509 16. Zadoks RN, Middleton JR, McDougall S, Katholm J, Schukken YH. 2011.  
510 Molecular epidemiology of mastitis pathogens of dairy cattle and comparative  
511 relevance to humans. *J Mammary Gland Biol Neoplasia* 16:357–372.
- 512 17. Kempf F, Slugocki C, Blum SE, Leitner G, Germon P. 2016. Genomic comparative  
513 study of bovine mastitis *Escherichia coli*. *PLoS One* 11:1–22.
- 514 18. Li T, Lu H, Wang X, Gao Q, Dai Y, Shang J, Li M. 2017. Molecular characteristics  
515 of *Staphylococcus aureus* causing bovine mastitis between 2014 and 2015. *Front*  
516 *Cell Infect Microbiol* 7:1–10.

- 517 19. Cheng J, Zhou M, Nobrega DB, Barkema HW, Xu S, Li M, Kastelic JP, Shi Y,  
518 Han B, Gao J. 2021. Genetic diversity and molecular epidemiology of outbreaks  
519 of *Klebsiella pneumoniae* mastitis on two large Chinese dairy farms. *J Dairy Sci*  
520 104:762-775.
- 521 20. Zheng Z, Gorden PJ, Xia X, Zheng Y, Li G. 2022. Whole-genome analysis of  
522 *Klebsiella pneumoniae* from bovine mastitis milk in the U.S. *Environ Microbiol*  
523 24:1183–1199.
- 524 21. Holmes AH, Moore LSP, Sundsfjord A, Steinbakk M, Regmi S, Karkey A, Guerin  
525 PJ, Piddock LJ V. 2016. Understanding the mechanisms and drivers of  
526 antimicrobial resistance. *Lancet* 387:176–187.
- 527 22. Ture M, Altinok I. 2016. Detection of putative virulence genes of *Lactococcus*  
528 *garvieae*. *Dis Aquat Organ* 119:59–66.
- 529 23. Meyburgh CM, Bragg RR, Boucher CE. 2018. Detection of virulence factors of  
530 South African *Lactococcus garvieae* isolated from rainbow trout, *Oncorhynchus*  
531 *mykiss* (Walbaum). *Onderstepoort J Vet Res* 85:e1–e9.
- 532 24. Rao S, Chen MY, Sudpraseart C, Lin P, Yoshida T, Wang PC, Chen SC. 2022.  
533 Genotyping and phenotyping of *Lactococcus garvieae* isolates from fish by  
534 pulse-field gel electrophoresis (PFGE) and electron microscopy indicate  
535 geographical and capsular variations. *J Fish Dis* 45:771–781.
- 536 25. Ballhausen B, Kriegeskorte A, van Alen S, Jung P, Köck R, Peters G, Bischoff M,  
537 Becker K. 2016. The pathogenicity and host adaptation of livestock-associated

- 538 MRSA CC398. *Vet Microbiol* 200:39-45.
- 539 26. Gori A, Harrison OB, Mlia E, Nishihara Y, Chan JM, Msefula J, Mallewa M, Dube  
540 Q, Swarthout TD, Nobbs AH, Maiden MCJ, French N, Heyderman RS. 2020.  
541 Pan-GWAS of *Streptococcus agalactiae* highlights lineage- specific genes  
542 associated with virulence and niche adaptation. *mBio* 11:e00728-20.
- 543 27. Garvie EI, Farrow JAE, Phillips BA. 1981. A taxonomic study of some strains of  
544 streptococci which grow at 10°C but not at 45°C including *Streptococcus lactis*  
545 and *Streptococcus cremoris*. *Zentralblatt fur Bakteriologie Angew und Okol Microbiol*  
546 *Abt1 OrigC Hyg* 2:151–165.
- 547 28. Aguado-Urda M, Gibello A, Blanco M del M, Fernández-Garayzábal JF,  
548 López-Alonso V, López-Campos GH. 2013. Global transcriptome analysis of  
549 *Lactococcus garvieae* strains in response to temperature. *PLoS One* 8:e79692.
- 550 29. Aguado-Urda M, López-Campos GH, Fernández-Garayzábal JF, Martín-Sánchez F,  
551 Gibello A, Domínguez L, Blanco MM. 2010. Analysis of the genome content of  
552 *Lactococcus garvieae* by genomic interspecies microarray hybridization. *BMC*  
553 *Microbiol* 10:79.
- 554 30. Hoai TD, Nishiki I, Yoshida T. 2016. Properties and genomic analysis of  
555 *Lactococcus garvieae* lysogenic bacteriophage PLgT-1, a new member of  
556 Siphoviridae, with homology to *Lactococcus lactis* phages. *Virus Res* 222:13–23.

- 557 31. Kim JH, Kang D-H, Park SC. 2015. Draft genome sequence of human-pathogenic  
558 *Lactococcus garvieae* LG-ilsanpaik-gs201105 that caused acute acalculous  
559 cholecystitis. *Genome Announc* 3:e00464-15.
- 560 32. Shahi N, Mallik SK. 2020. Emerging bacterial fish pathogen *Lactococcus garvieae*  
561 RTCLI04, isolated from rainbow trout (*Oncorhynchus mykiss*): Genomic features  
562 and comparative genomics. *Microb Pathog* 147:104368.
- 563 33. Moumene M, Drissi F, Croce O, Djebbari B, Robert C, Angelakis E, Benouareth  
564 DE, Raoult D, Merhej V. 2016. Complete genome sequence and description of  
565 *Lactococcus garvieae* M14 isolated from Algerian fermented milk. *New Microbes*  
566 *New Infect* 10:122–131.
- 567 34. Morita H, Toh H, Oshima K, Yoshizaki M, Kawanishi M, Nakaya K, Suzuki T,  
568 Miyauchi E, Ishii Y, Tanabe S, Murakami M, Hattori M. 2011. Complete genome  
569 sequence and comparative analysis of the fish pathogen *Lactococcus garvieae*.  
570 *PLoS One* 6:e23184.
- 571 35. Nishiki I, Oinaka D, Iwasaki Y, Yasuike M, Nakamura Y, Yoshida T, Fujiwara A,  
572 Nagai S, Katoh M, Kobayashi T. 2016. Complete genome sequence of  
573 nonagglutinating *lactococcus garvieae* strain 122061 isolated from yellowtail in  
574 Japan. *Genome Announc* 4:e00592-16.
- 575 36. Chang CI, Hung PH, Wu CC, Cheng TC, Tsai JM, Lin KJ, Lin CY. 2012.  
576 Simultaneous detection of multiple fish pathogens using a naked-eye readable  
577 DNA microarray. *Sensors (Basel)* 12:2710–2728.

- 578 37. Thiry D, Billen F, Boyen F, Duprez JN, Quenault H, Touzain F, Blanchard Y,  
579 Clercx C, Mainil JG. 2021. Genomic relatedness of a canine *Lactococcus garvieae*  
580 to human, animal and environmental isolates. *Res Vet Sci* 137:170–173.
- 581 38. Ferrario C, Ricci G, Milani C, Lugli GA, Ventura M, Eraclio G, Borgo F, Fortina  
582 MG. 2013. *Lactococcus garvieae*: Where is it from? A first approach to explore  
583 the evolutionary history of this emerging pathogen. *PLoS One* 8:e84796.
- 584 39. Nelson MC, Varney JS, Welch TJ, Graf J. 2016. Draft genome sequence of  
585 *Lactococcus garvieae* strain PAQ102015-99, an outbreak strain isolated from a  
586 commercial trout farm in the Northwestern United States. *Genome Announc*  
587 4:e00781-16.
- 588 40. Miyauchi E, Toh H, Nakano A, Tanabe S, Morita H. 2012. Comparative genomic  
589 analysis of *Lactococcus garvieae* strains isolated from different sources reveals  
590 candidate virulence genes. *Int J Microbiol* 2012:728276.
- 591 41. Werner B, Moroni P, Gioia G, Lavín-Alconero L, Yousaf A, Charter ME, Carter  
592 BM, Bennett J, Nydam D V., Welcome F, Schukken YH. 2014. Short  
593 communication: Genotypic and phenotypic identification of environmental  
594 streptococci and association of *Lactococcus lactis* ssp. *lactis* with intramammary  
595 infections among different dairy farms. *J Dairy Sci* 97:6964–6969.
- 596 42. Malek A, De la Hoz A, Gomez-Villegas SI, Nowbakht C, Arias CA. 2019.  
597 *Lactococcus garvieae*, an unusual pathogen in infective endocarditis: case report  
598 and review of the literature. *BMC Infect Dis* 19:301.

- 599 43. Kotzamanidis C, Malousi A, Bitchava K, Vafeas G, Chatzidimitriou D, Skoura L,  
600 Papadimitriou E, Chatzopoulou F, Zdragas A. 2020. First report of isolation and  
601 genome sequence of *L. petauri* strain from a rainbow trout Lactococcosis outbreak.  
602 *Curr Microbiol* 77:1089–1096.
- 603 44. Reguera-Brito M, Galán-Sánchez F, Blanco MM, Rodríguez-Iglesias M,  
604 Domínguez L, Fernández-Garayzábal JF, Gibello A. 2016. Genetic analysis of  
605 human clinical isolates of *Lactococcus garvieae*: Relatedness with isolates from  
606 foods. *Infect Genet Evol* 37:185–191.
- 607 45. Chun J, Oren A, Ventosa A, Christensen H, Arahal DR, da Costa MS, Rooney AP,  
608 Yi H, Xu XW, De Meyer S, Trujillo ME. 2018. Proposed minimal standards for  
609 the use of genome data for the taxonomy of prokaryotes. *Int J Syst Evol Microbiol*  
610 68:461–466.
- 611 46. Naushad S, Adeolu M, Goel N, Khadka B, Al-Dahwi A, Gupta RS. 2015.  
612 Phylogenomic and molecular demarcation of the core members of the  
613 polyphyletic pasteuraceae genera actinobacillus, haemophilus, and pasteurilla.  
614 *Int J Genomics* 2015:198560.
- 615 47. Kimura H, Kusuda R. 1982. Studies on the pathogenesis of streptococcal infection  
616 in cultured yellowtails, *Seriola* spp.: effect of crude exotoxin fractions from cell-  
617 free culture on experimental streptococcal infection. *J Fish Dis* 5:471–478.
- 618 48. Schmidtke LM, Carson J. 2003. Antigen recognition by rainbow trout  
619 (*Oncorhynchus mykiss*) of whole cell proteins expressed by *Lactococcus garvieae*

- 620 when obtained directly from fish and under iron limited culture conditions. *Vet*  
621 *Microbiol* 93:63–71.
- 622 49. Kawanishi M, Yoshida T, Kijima M, Yagyu K, Nakai T, Okada S, Endo A,  
623 Murakami M, Suzuki S, Morita H. 2007. Characterization of *Lactococcus*  
624 *garvieae* isolated from radish and broccoli sprouts that exhibited a KG+  
625 phenotype, lack of virulence and absence of a capsule. *Lett Appl Microbiol*  
626 44:481–487.
- 627 50. Shahi N, Mallik SK, Sahoo M, Chandra S, Singh AK. 2018. First report on  
628 characterization and pathogenicity study of emerging *Lactococcus garvieae*  
629 infection in farmed rainbow trout, *Oncorhynchus mykiss* (Walbaum), from India.  
630 *Transbound Emerg Dis* 65:1039–1048.
- 631 51. Aguado-Urda M, Rodríguez-Bertos A, de las Heras AI, Blanco MM, Acosta F, Cid  
632 R, Fernández-Garayzábal JF, Gibello A. 2014. Experimental *Lactococcus*  
633 *garvieae* infection in zebrafish and first evidence of its ability to invade  
634 non-phagocytic cells. *Vet Microbiol* 171:248–254.
- 635 52. Tsai MA, Wang PC, Cao TT, Liao PC, Liaw LL, Chen SC. 2013.  
636 Immunoprotection of glyceraldehyde-3-phosphate dehydrogenase (GAPDH)  
637 from *Lactococcus garvieae* against Lactococcosis in tilapia. *J Gen Appl Microbiol*  
638 59:437–449.
- 639 53. Walther C, Rossano A, Thomann A, Perreten V. 2008. Antibiotic resistance in  
640 *Lactococcus* species from bovine milk: presence of a mutated multidrug

- 641 transporter *mdt(A)* gene in susceptible *Lactococcus garvieae* strains. *Vet*  
642 *Microbiol* 131:348–357.
- 643 54. Elliott JA, Facklam RR. 1996. Antimicrobial susceptibilities of *Lactococcus lactis*  
644 and *Lactococcus garvieae* and a proposed method to discriminate between them. *J*  
645 *Clin Microbiol* 34:1296–1298.
- 646 55. Shi YZ, Yoshida T, Fujiwara A, Nishiki I. 2021. Characterization of *lsa(D)*, a novel  
647 gene responsible for resistance to lincosamides, streptogramins A, and  
648 pleuromutilins in fish pathogenic *Lactococcus garvieae* Serotype II. *Microb Drug*  
649 *Resist* 27:301–310.
- 650 56. Kehrenberg C, Ojo KK, Schwarz S. 2004. Nucleotide sequence and organization of  
651 the multiresistance plasmid pSCFS1 from *Staphylococcus sciuri*. *J Antimicrob*  
652 *Chemother* 54:936–939.
- 653 57. Malbruny B, Werno AM, Murdoch DR, Leclercq R, Cattoir V. 2011.  
654 Cross-resistance to lincosamides, streptogramins A, and pleuromutilins due to the  
655 *lsa(C)* gene in *Streptococcus agalactiae* UCN70. *Antimicrob Agents Chemother*  
656 55:1470–1474.
- 657 58. Singh K V, Murray BE. 2005. Differences in the *Enterococcus faecalis* *lsa* locus  
658 that influence susceptibility to quinupristin-dalfopristin and clindamycin.  
659 *Antimicrob Agents Chemother* 49:32–39.
- 660 59. Ali T, Ur Rahman S, Zhang L, Shahid M, Zhang S, Liu G, Gao J, Han B. 2016.  
661 ESBL-producing *Escherichia coli* from cows suffering mastitis in China contain



- 662 clinical class 1 integrons with CTX-M linked to ISCR1. *Front Microbiol* 7:1–11.
- 663 60. Perreten V, Schwarz F V., Teuber M, Levy SB. 2001. Mdt(A), a new efflux protein  
664 conferring multiple antibiotic resistance in *Lactococcus lactis* and *Escherichia*  
665 *coli*. *Antimicrob Agents Chemother* 45:1109–1114.
- 666 61. Cai J, Chen J, Schwarz S, Wang Y, Zhang R. 2021. Detection of the plasmid-borne  
667 oxazolidinone/phenicol resistance gene *optrA* in *Lactococcus garvieae* isolated  
668 from faecal samples. *Clin Microbiol Infect* 27:1358-1359.
- 669 62. Baker S, Thomson N, Holt KE. 2018. Genomic insights into the emergence and  
670 spread of antimicrobial-resistant bacterial pathogens *Science* 360: 738:733–738.
- 671 63. Kim SR, Nonaka L, Suzuki S. 2004. Occurrence of tetracycline resistance genes  
672 *tet(M)* and *tet(S)* in bacteria from marine aquaculture sites. *FEMS Microbiol Lett*  
673 237:147–156.
- 674 64. Eraclio G, Ricci G, Fortina MG. 2015. Insertion sequence elements in *Lactococcus*  
675 *garvieae*. *Gene* 555:291–296.
- 676 65. Eraclio G, Tremblay DM, Lacelle-Côté A, Labrie SJ, Fortina MG, Moineau S. 2015.  
677 A virulent phage infecting *Lactococcus garvieae*, with homology to *Lactococcus*  
678 *lactis* phages. *Appl Environ Microbiol* 81:8358–8365.
- 679 66. Colagrossi L, Costabile V, Scutari R, Agosta M, Onori M, Mancinelli L, Lucignano  
680 B, Muda AO, Baldo G Del, Mastronuzzi A, Locatelli F, Trua G, Montanari M,  
681 Alteri C, Bernaschi P, Perno CF. 2022. Evidence of pediatric sepsis caused by a  
682 drug resistant *Lactococcus garvieae* contaminated platelet concentrate. *Emerg*

- 683        *Microbes Infect* 11:1325-1334.
- 684    67. NMC. 2017. Laboratory Handbook on Bovine Mastitis, 3rd ed. National Mastitis  
685        Council, Minnesota, USA.
- 686    68. Bowers RM, Kyrpidis NC, Stepanauskas R, Harmon-Smith M, Doud D, Reddy  
687        TBK, Schulz F, Jarett J, Rivers AR, Eloie-Fadrosh EA, Tringe SG, Ivanova NN,  
688        Copeland A, Clum A, Becraft ED, Malmstrom RR, Birren B, Podar M, Bork P,  
689        Weinstock GM, Garrity GM, Dodsworth JA, Yooseph S, Sutton G, Glöckner FO,  
690        Gilbert JA, Nelson WC, Hallam SJ, Jungbluth SP, Ettema TJG, Tighe S,  
691        Konstantinidis KT, Liu WT, Baker BJ, Rattei T, Eisen JA, Hedlund B, McMahon  
692        KD, Fierer N, Knight R, Finn R, Cochrane G, Karsch-Mizrachi I, Tyson GW,  
693        Rinke C, Lapidus A, Meyer F, Yilmaz P, Parks DH, Eren AM, Schriml L, Banfield  
694        JF, Hugenholtz P, Woyke T. 2017. Minimum information about a single amplified  
695        genome (MISAG) and a metagenome-assembled genome (MIMAG) of bacteria  
696        and archaea. *Nat Biotechnol* 35:725–731.
- 697    69. Lin YS, Kweh KH, Koh TH, Lau QC, Abdul Rahman NB. 2020. Genomic analysis  
698        of *Lactococcus garvieae* isolates. *Pathology* 52:700–707.
- 699    70. Aguado-Urda M, López-Campos GH, Blanco MM, Fernández-Garayzábal JF,  
700        Cutuli MT, Aspiroz C, López-Alonso V, Gibello A. 2011. Genome sequence of  
701        *Lactococcus garvieae* 21881, isolated in a case of human septicemia. *J Bacteriol*  
702        193:4033–4034.
- 703

704 **FIGURE CAPTIONS**

705 **FIG 1 Minimum spanning tree based on Multi-Locus Sequence Typing for 86**

706 *Lactococcus garvieae* isolates involving 32 sequence types performed by

707 **geoBURST** algorithm and visualized by **PhyloViz**. Five clonal complexes

708 (CC1-CC5) were clustered with similar STs (5 - 7 shared alleles); the number

709 between nodes indicates the number of distinct alleles within them.

710

711 **FIG 2 Distribution of antimicrobial resistance genes against each category of**

712 **antimicrobial resistance, together with source of host, country, and clonal**

713 **complex (CC) of 86 *Lactococcus garvieae* isolates.**

714

715 **FIG 3 Distribution of virulence factor genes, source of host, country, and clonal**

716 **complex (CC) of 86 *Lactococcus garvieae* isolates.**

717

718 **FIG 4 Pan-genome of 86 *Lactococcus garvieae* isolates in this study. The**

719 pan-genome consisted of 6310 genes, of which, 1015 core genes, 3641 accessory genes

720 and 1654 unique genes; the size of the genome in the pan-genome increased as the

721 number of isolates increased, but pan-genome size approached convergence. The

722 number of core genes (shared by all isolates) was fairly constant at 1015 genes **(A)**.

723 Distribution of KEGG **(B)** and COG **(C, D)** functional categories in core, accessory and

724 unique genes of 86 *Lactococcus garvieae*.

725

726 **FIG 5 Phylogenetic tree. (A).** based on 16S rRNA with source of host (4 hosts, the  
727 first ring indicated by a rectangle) and country (16 countries, the second ring indicated  
728 by a circle) as well as sequence types (STs, 32 STs, the outermost ring indicated by a  
729 triangle) of 86 *Lactococcus garvieae* isolates. **(B).** Phylogenetic tree based on core  
730 genes with source of host (4 hosts, the innermost ring indicated by a rectangle) and  
731 country (16 countries, the second ring indicated by a circle) as well as sequence types  
732 (STs, 32 STs, the outermost ring indicated by a triangle) of 86 *Lactococcus garvieae*  
733 isolates.

734

735 **FIG 6 Phylogenetic tree based on core genome single nucleotide polymorphism of**  
736 **86 *Lactococcus garvieae* isolates.**

737

738 **FIG 7 Co-occurrence of virulence genes in 86 *Lactococcus garvieae* isolates.**

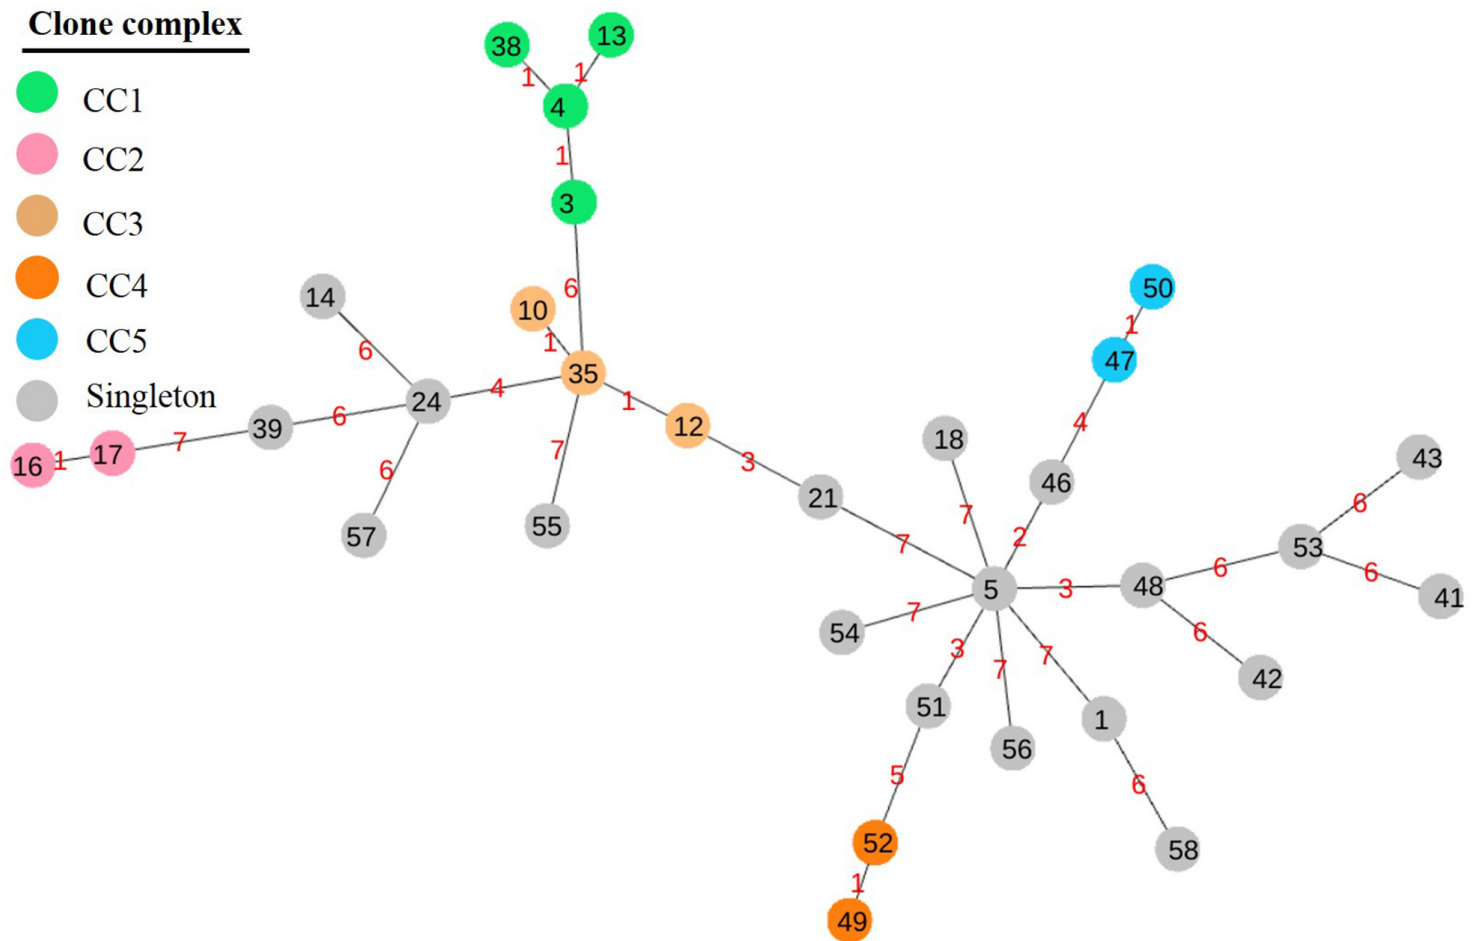

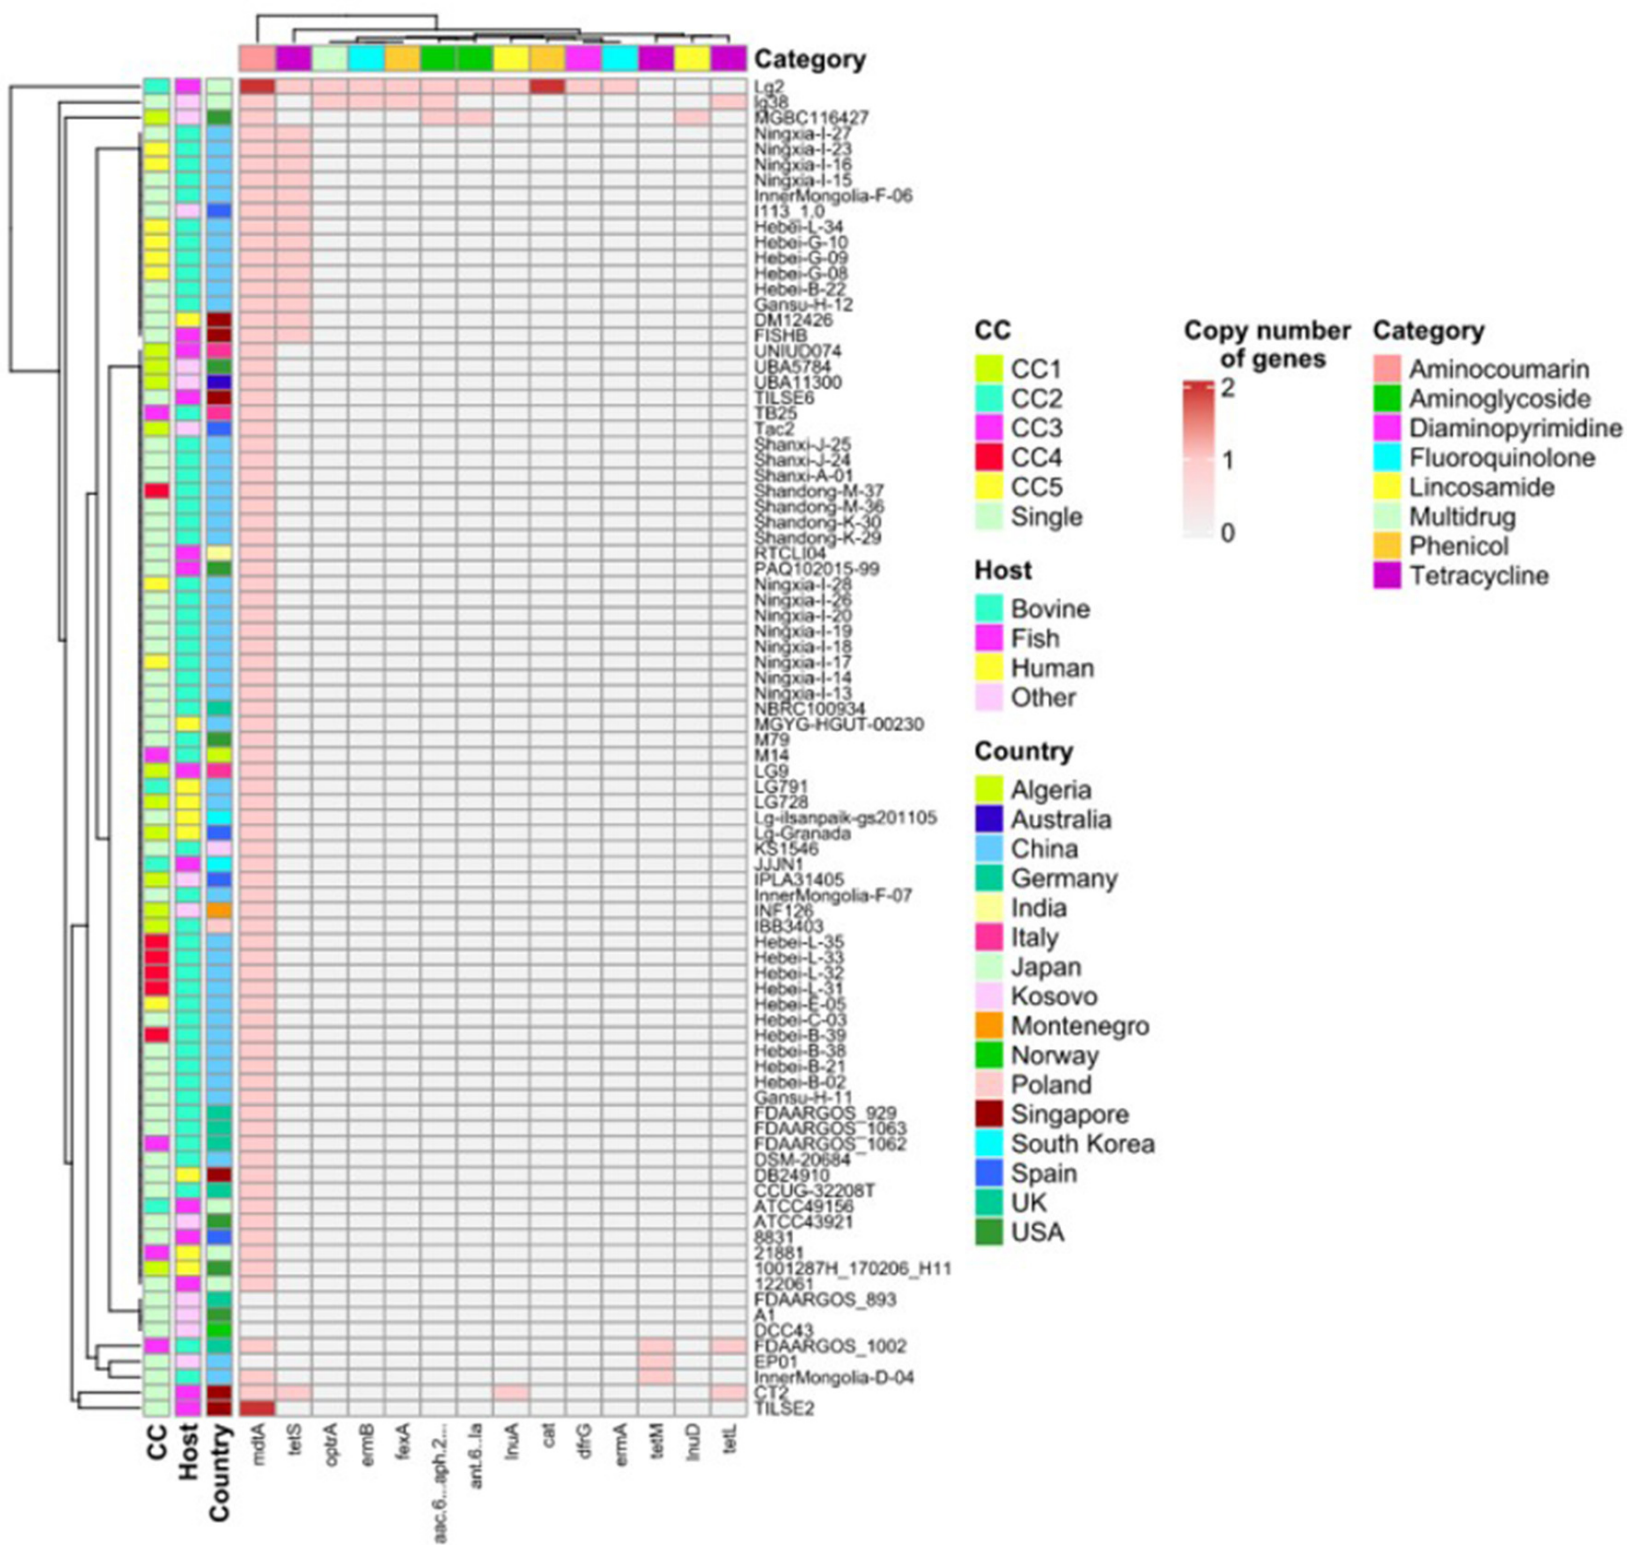

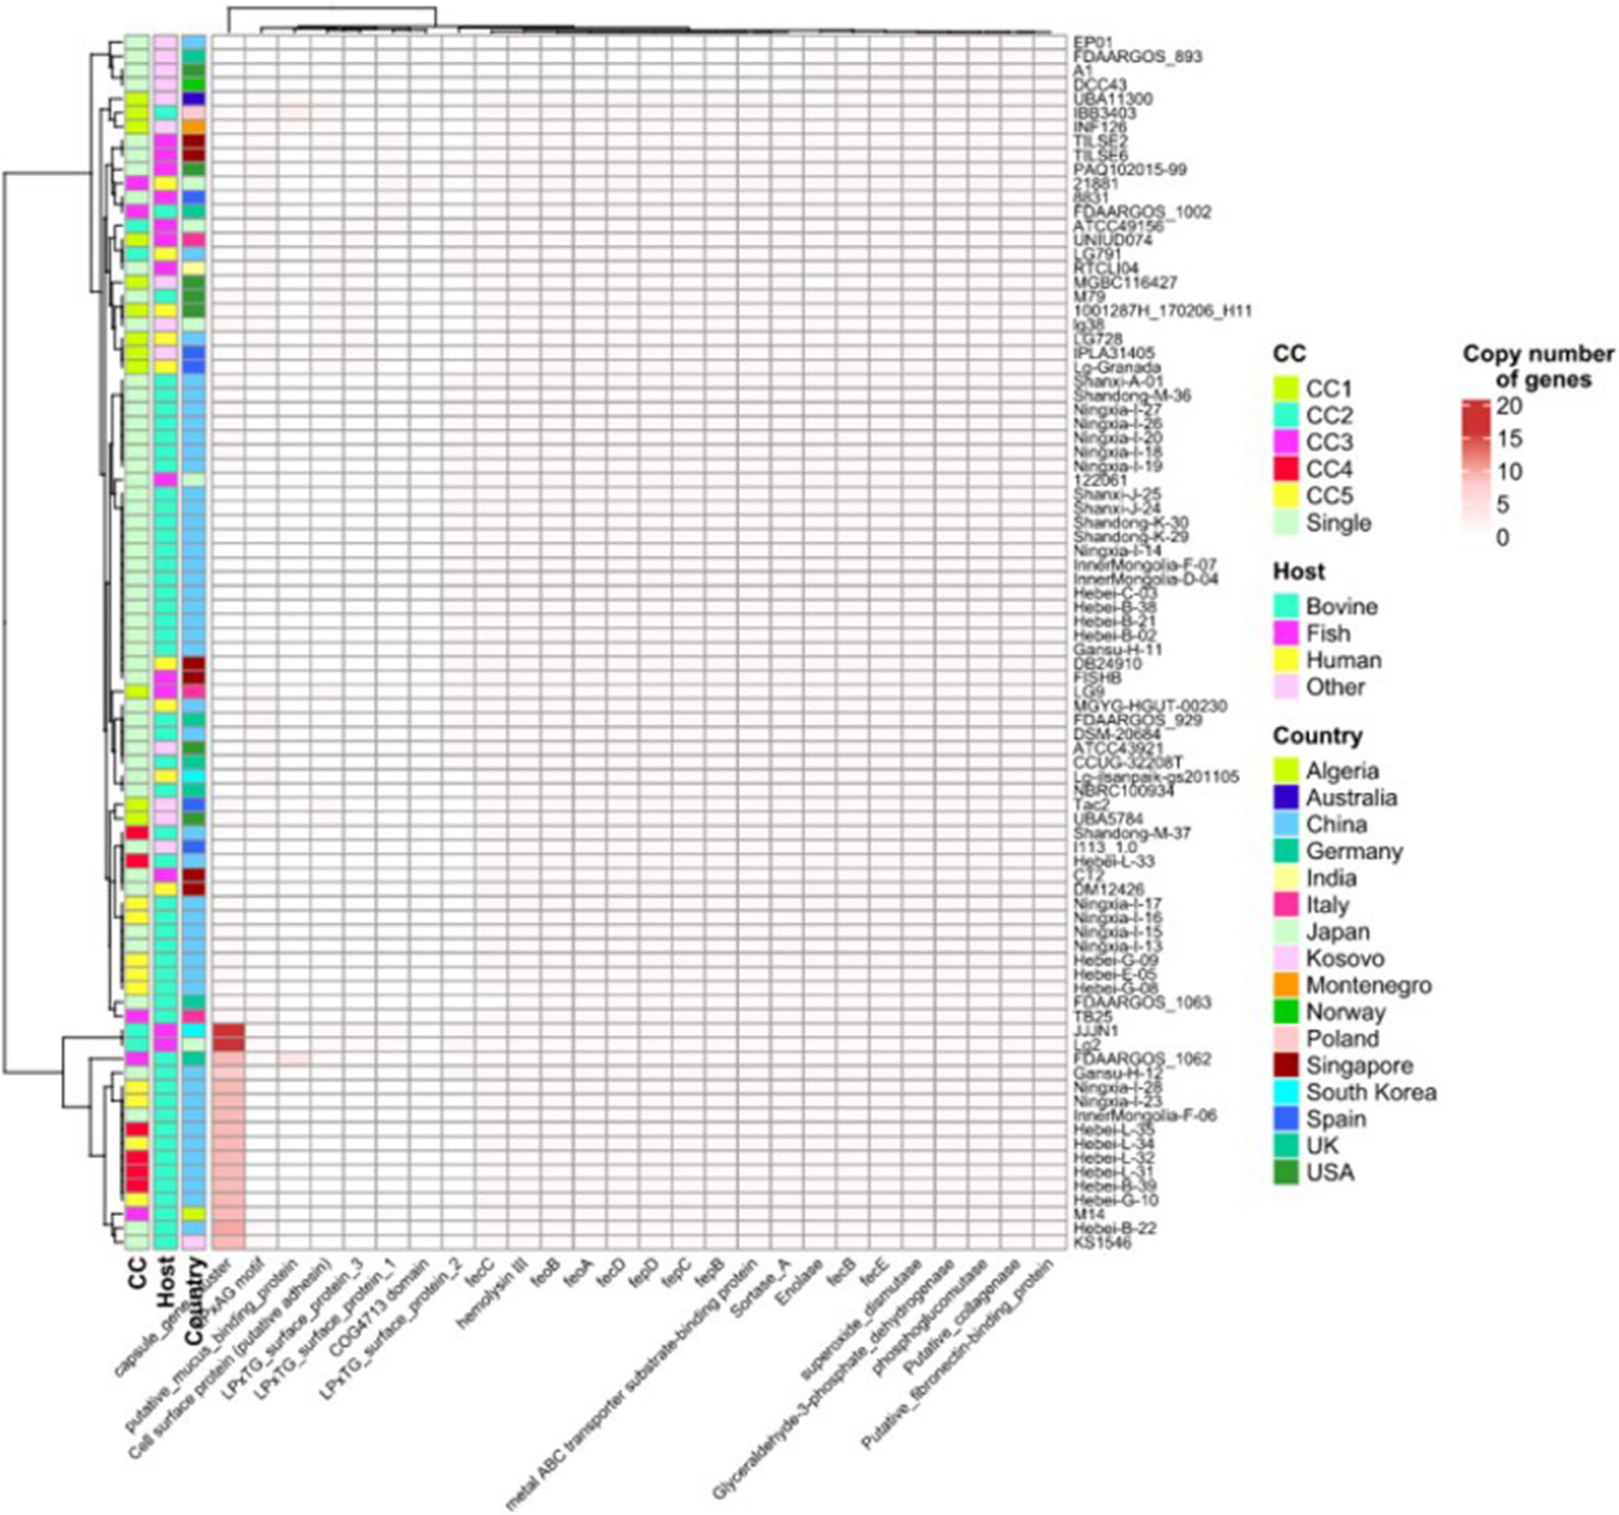

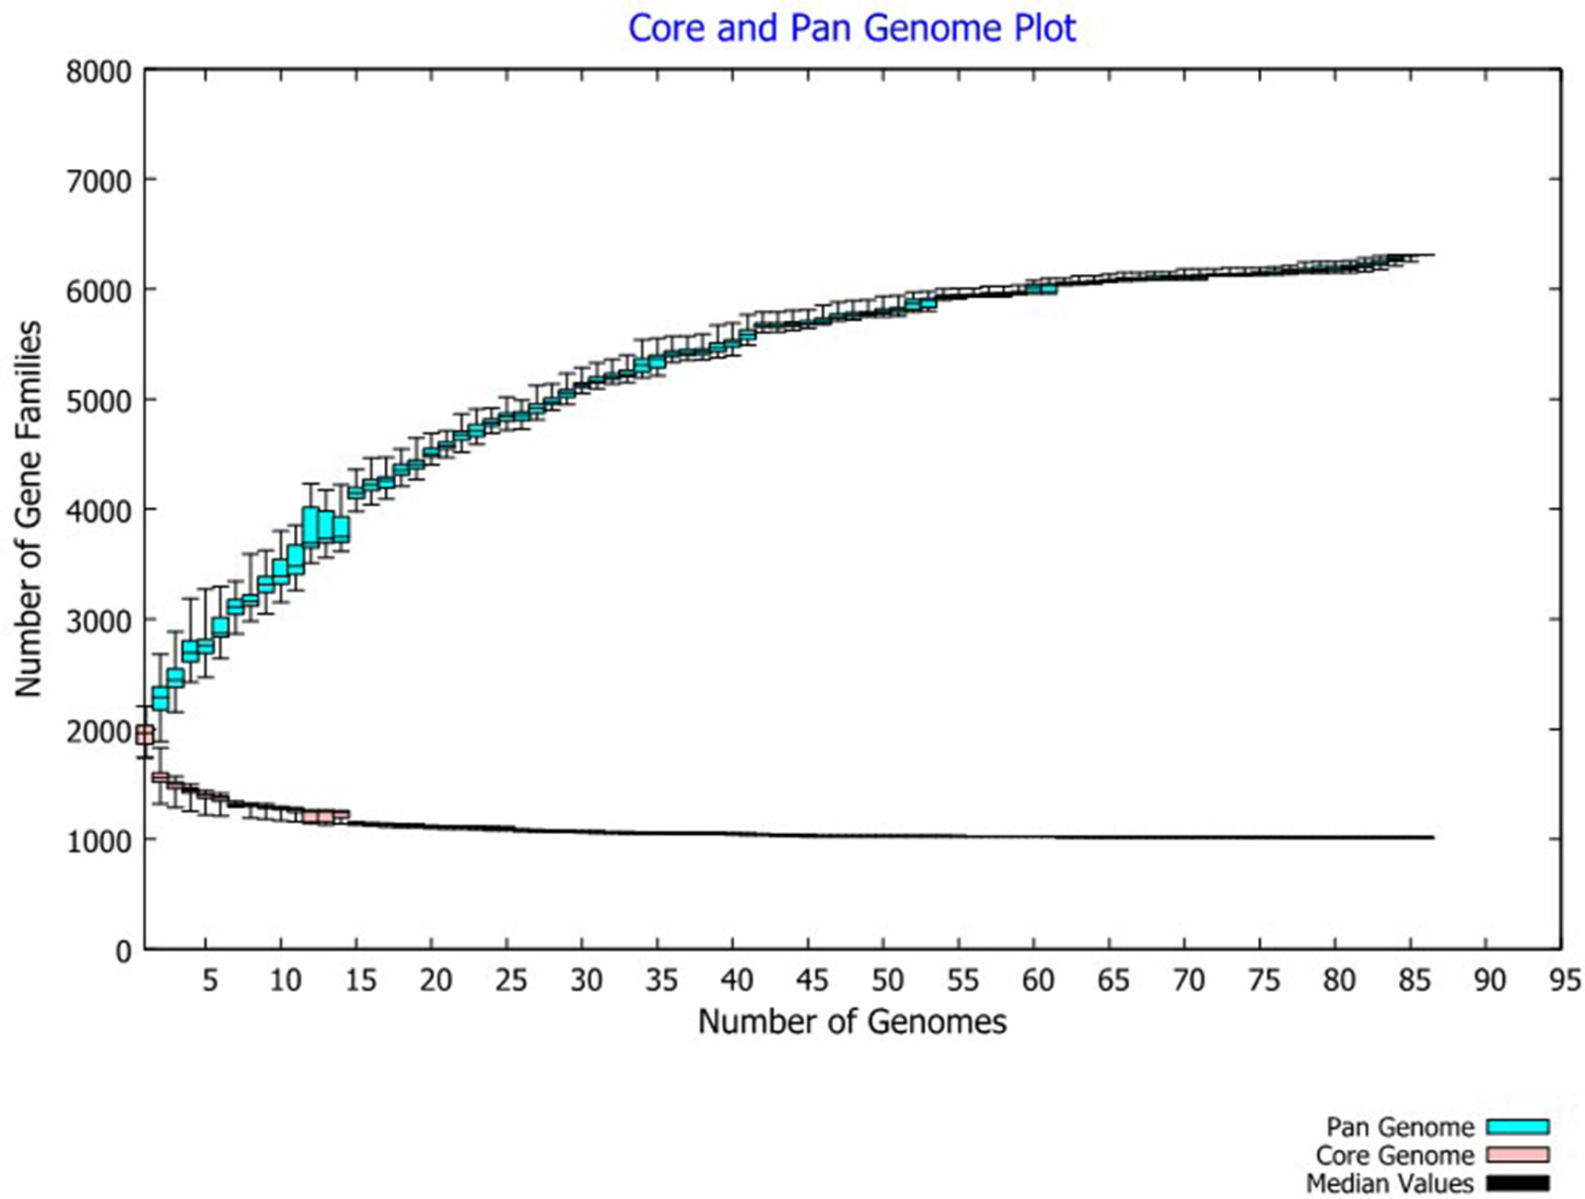



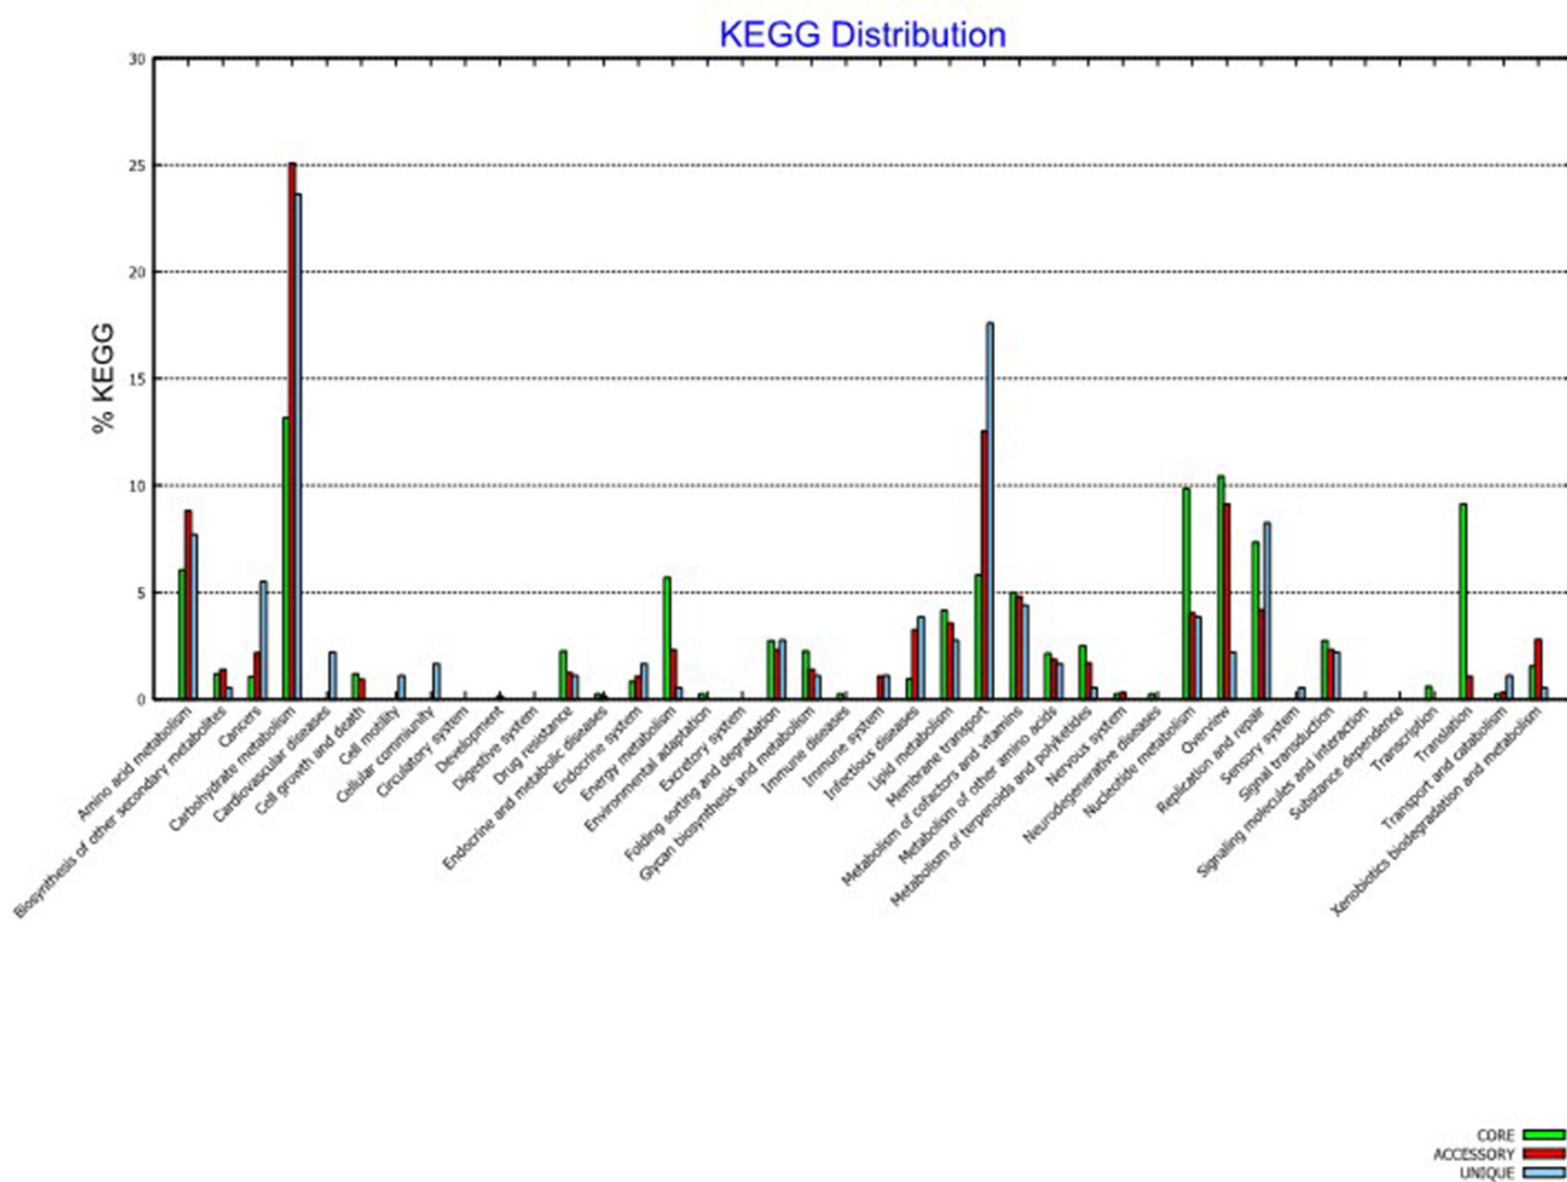

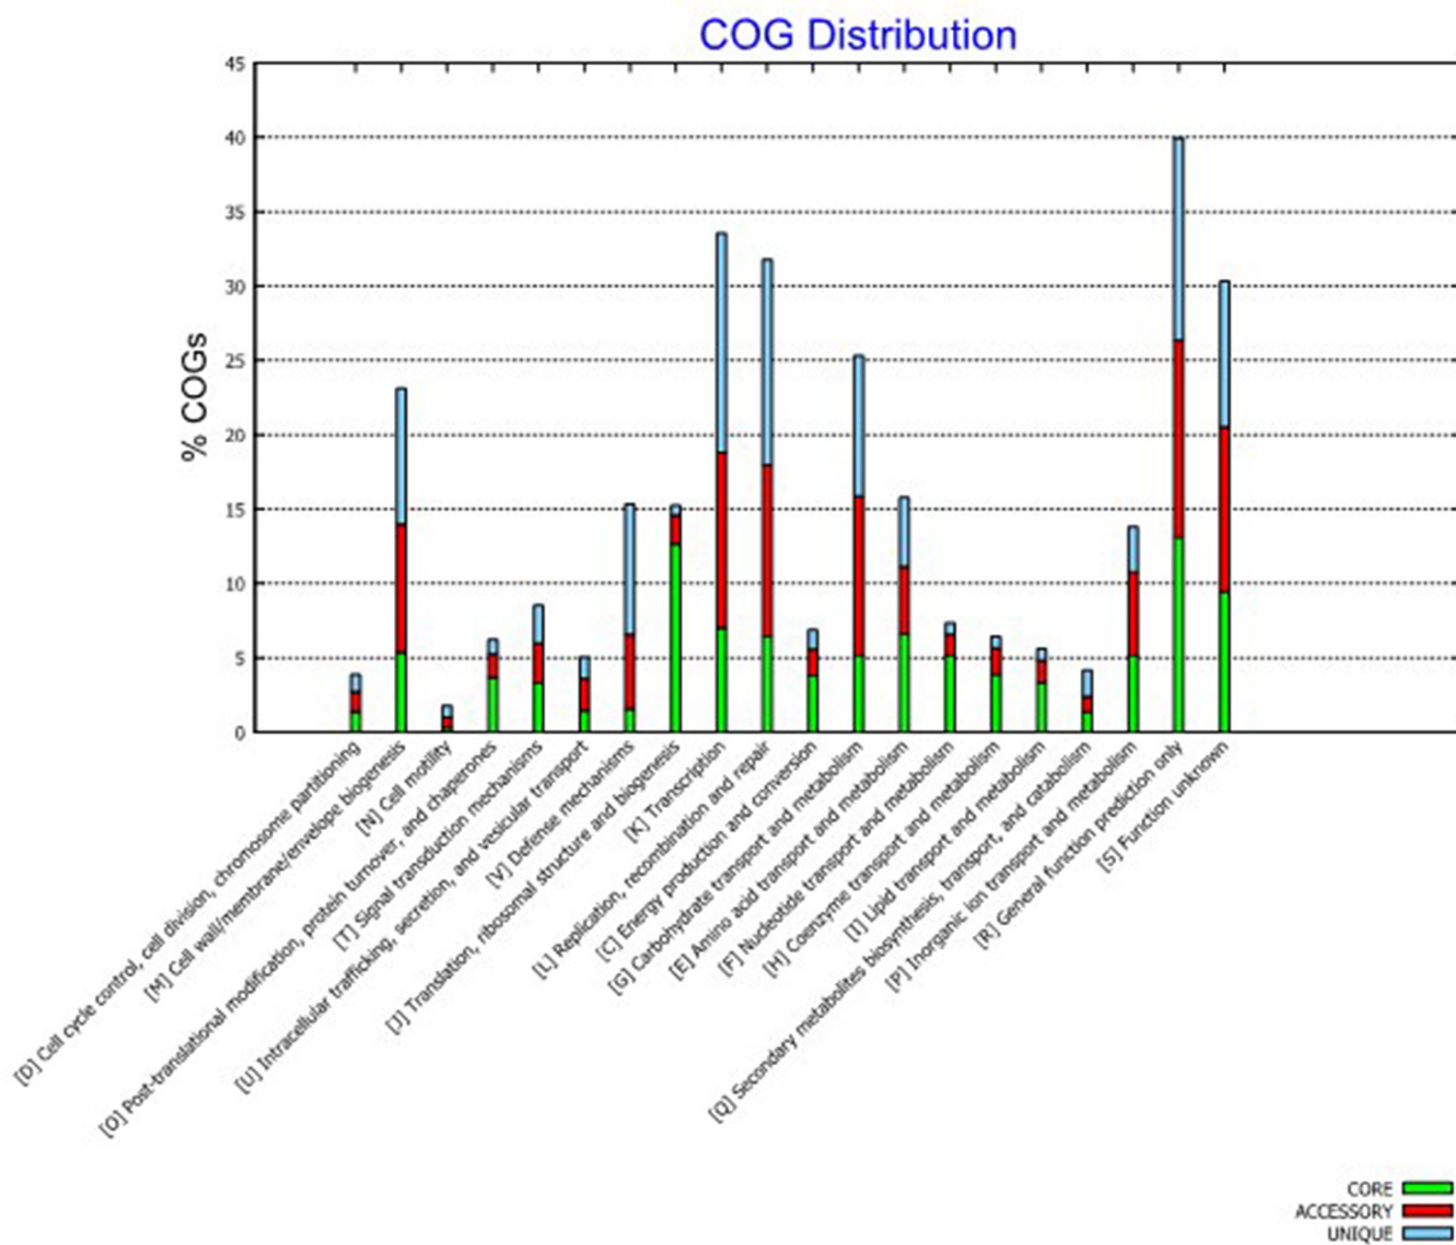

## KEGG Distribution

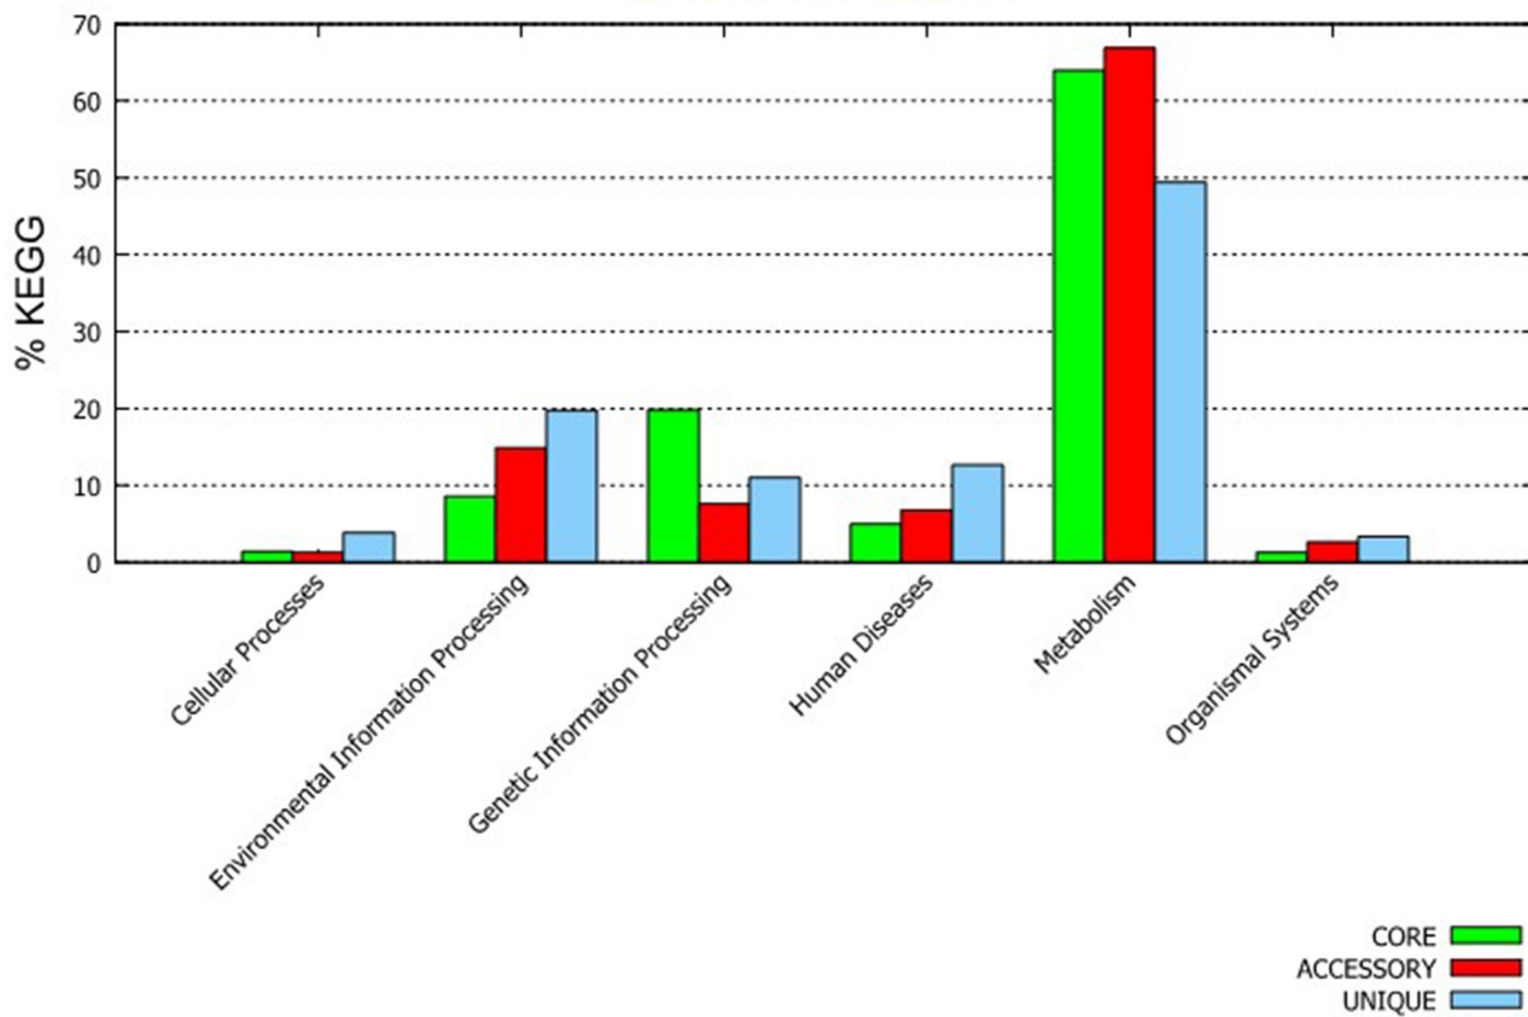

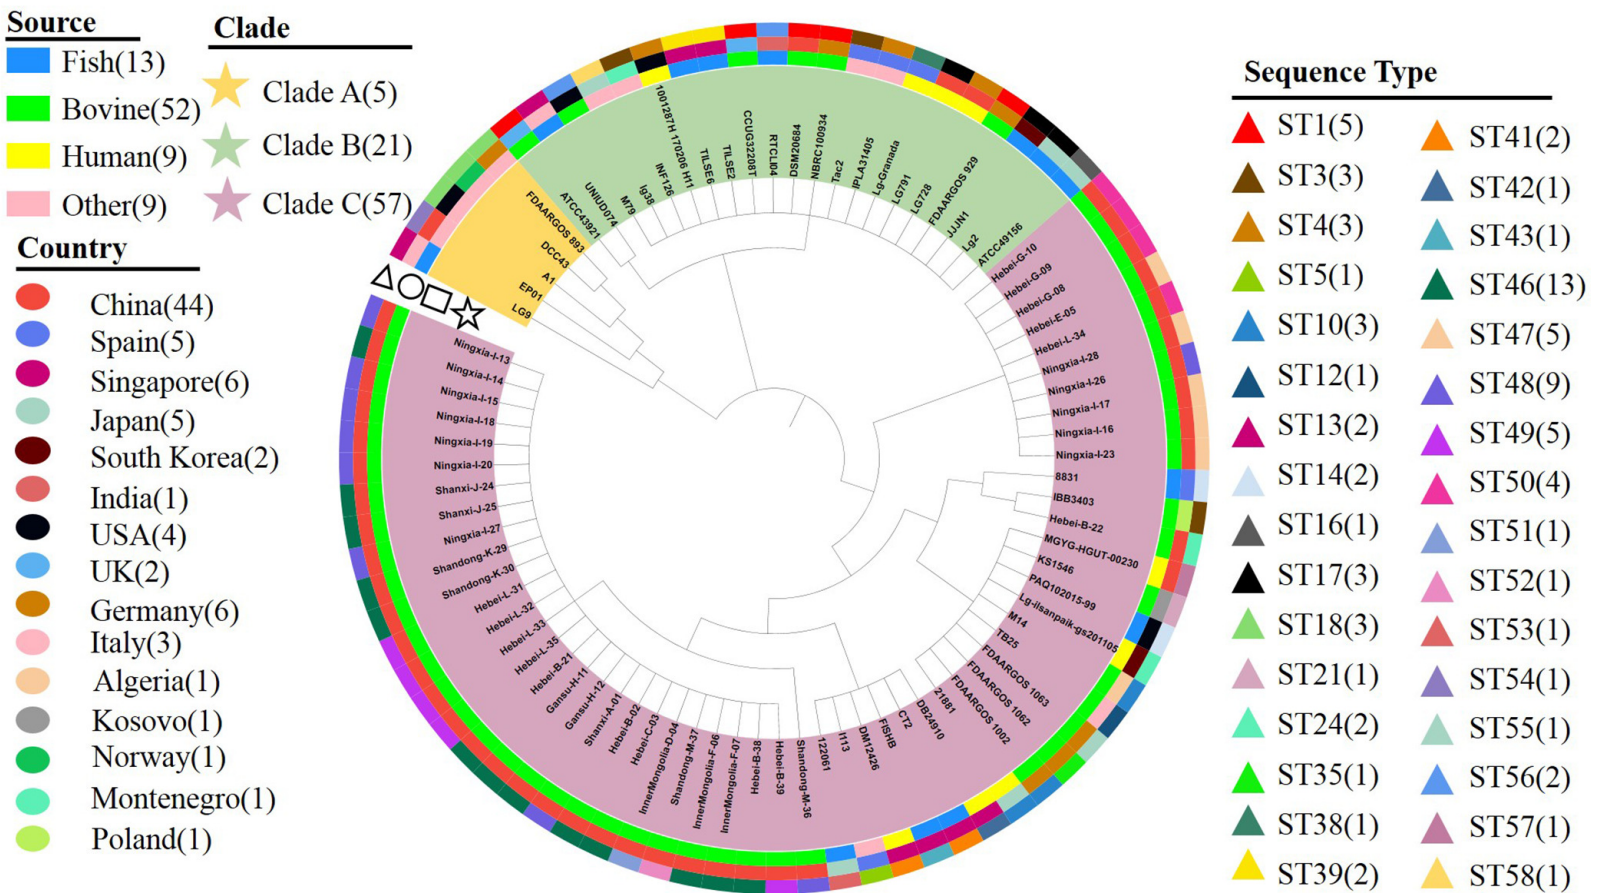

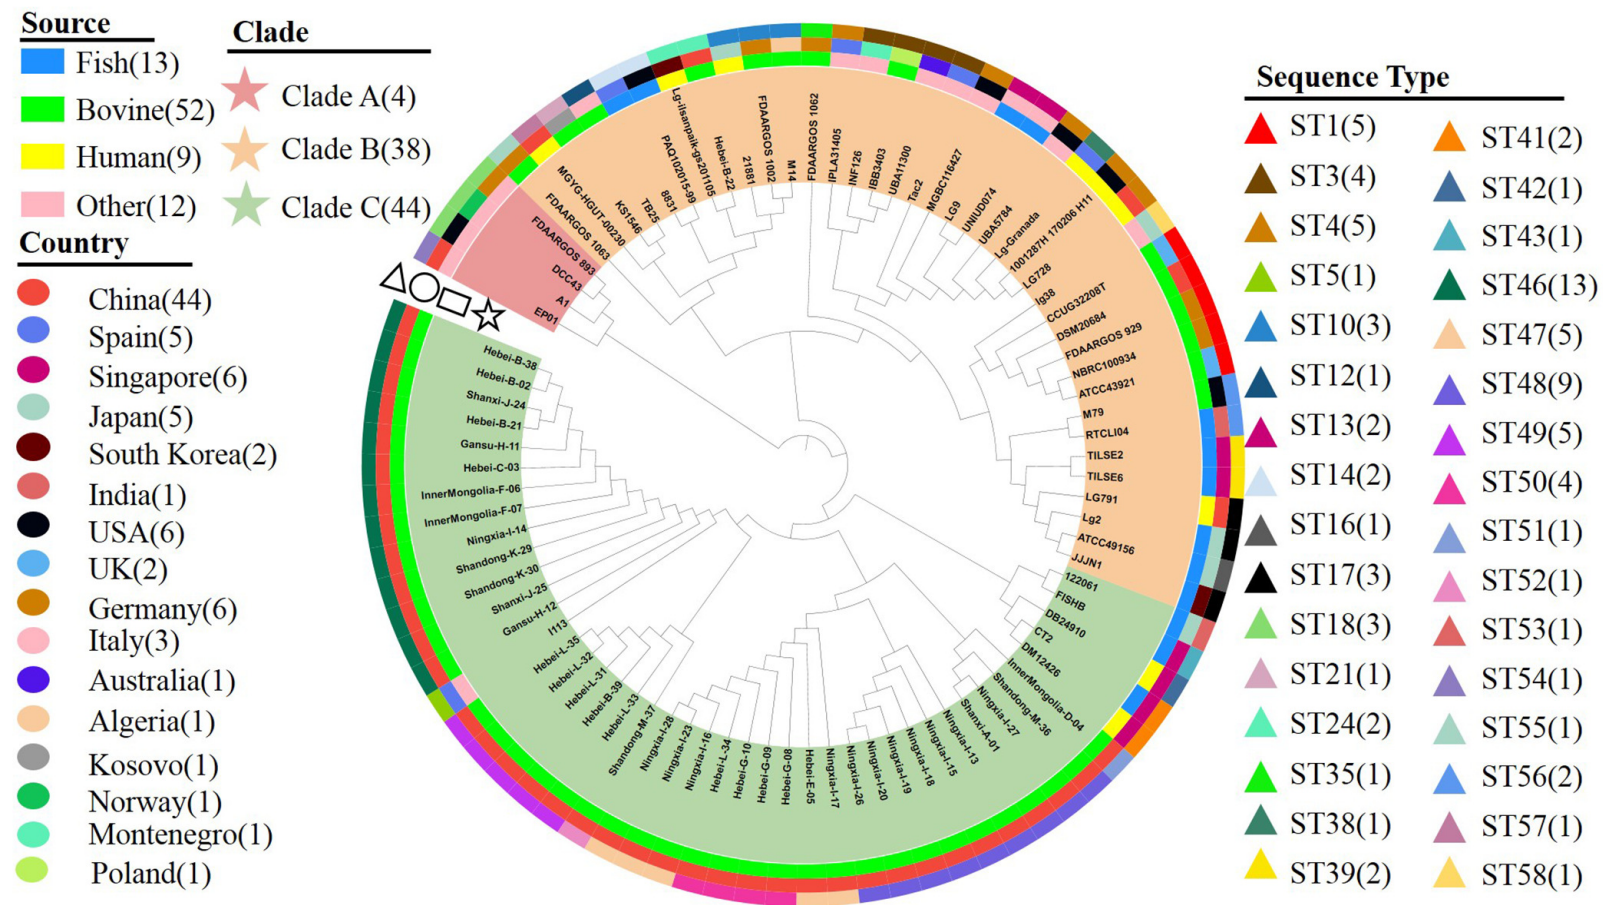

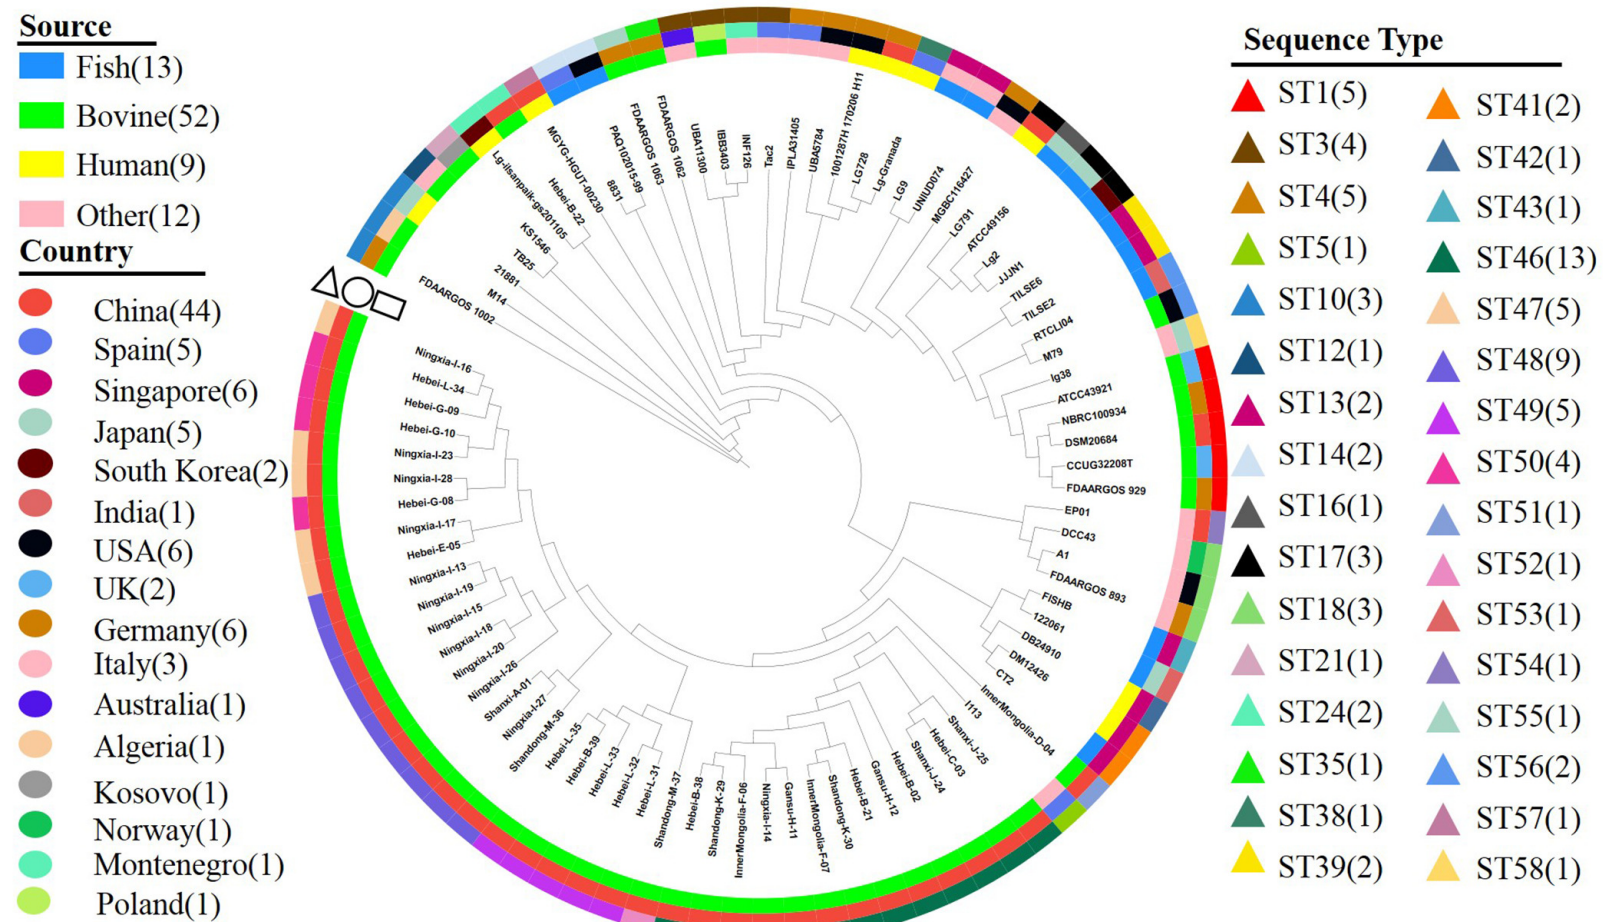



**Table 1** *Lactococcus garvieae* isolates (n=39) recovered from bovine mastitis from 2899 bovine mastitis (CM) milk samples collected from farms in China.

| Isolate            | Province       | Farm | Date      |
|--------------------|----------------|------|-----------|
| Shanxi-A-01        | Shanxi         | A    | 2018.1.29 |
| Hebei-B-02         | Hebei          | B    | 2018.4.9  |
| Hebei-C-03         | Hebei          | C    | 2018.5.11 |
| InnerMongolia-D-04 | Inner Mongolia | D    | 2018.6.26 |
| Hebei-E-05         | Hebei          | E    | 2018.7.16 |
| InnerMongolia-F-06 | Inner Mongolia | F    | 2019.6.25 |
| InnerMongolia-F-07 | Inner Mongolia | F    | 2019.6.25 |
| Hebei-G-08         | Hebei          | G    | 2019.6.29 |
| Hebei-G-09         | Hebei          | G    | 2019.6.29 |
| Hebei-G-10         | Hebei          | G    | 2019.6.29 |
| Gansu-H-11         | Gansu          | H    | 2020.8.12 |
| Gansu-H-12         | Gansu          | H    | 2020.8.12 |
| Ningxia-I-13       | Ningxia        | I    | 2020.8.12 |
| Ningxia-I-14       | Ningxia        | I    | 2020.8.12 |
| Ningxia-I-15       | Ningxia        | I    | 2020.8.12 |
| Ningxia-I-16       | Ningxia        | I    | 2020.8.12 |
| Ningxia-I-17       | Ningxia        | I    | 2020.8.24 |
| Ningxia-I-18       | Ningxia        | I    | 2020.8.24 |
| Ningxia-I-19       | Ningxia        | I    | 2020.8.24 |
| Ningxia-I-20       | Ningxia        | I    | 2020.8.24 |
| Hebei-B-21         | Hebei          | B    | 2020.8.27 |
| Hebei-B-22         | Hebei          | B    | 2020.8.27 |
| Ningxia-I-23       | Ningxia        | I    | 2020.10.2 |
| Shanxi-J-24        | Shanxi         | J    | 2020.11.1 |
| Shanxi-J-25        | Shanxi         | J    | 2020.11.1 |
| Ningxia-I-26       | Ningxia        | I    | 2020.11.6 |
| Ningxia-I-27       | Ningxia        | I    | 2020.11.6 |
| Ningxia-I-28       | Ningxia        | I    | 2021.1.29 |
| Shandong-K-29      | Shandong       | K    | 2021.6.9  |
| Shandong-K-30      | Shandong       | K    | 2021.6.9  |
| Hebei-L-31         | Hebei          | L    | 2021.6.10 |
| Hebei-L-32         | Hebei          | L    | 2021.6.10 |
| Hebei-L-33         | Hebei          | L    | 2021.6.10 |
| Hebei-L-34         | Hebei          | L    | 2021.6.10 |
| Hebei-L-35         | Hebei          | L    | 2021.6.10 |
| Shandong-M-36      | Shandong       | M    | 2021.6.28 |
| Shandong-M-37      | Shandong       | M    | 2021.6.28 |



---

|            |       |   |           |
|------------|-------|---|-----------|
| Hebei-B-38 | Hebei | B | 2021.7.12 |
|------------|-------|---|-----------|

---

Table 2 Allelic profiles, sequence types and clonal complexes of 86 *Lactococcus garvieae* isolates.

| Isolate id            | ST   | CC   | Allelic profile |      |      |      |      |      |     |
|-----------------------|------|------|-----------------|------|------|------|------|------|-----|
|                       |      |      | als             | galP | gapC | gyrB | atpA | rpoC | tuf |
| ATCC43921             | ST1  | Sing | 1               | 1    | 1    | 1    | 1    | 1    | 1   |
| CCUG32208T            | ST1  | Sing | 1               | 1    | 1    | 1    | 1    | 1    | 1   |
| DSM20684              | ST1  | Sing | 1               | 1    | 1    | 1    | 1    | 1    | 1   |
| FDAARGOS_929          | ST1  | Sing | 1               | 1    | 1    | 1    | 1    | 1    | 1   |
| NBRC100934            | ST1  | Sing | 1               | 1    | 1    | 1    | 1    | 1    | 1   |
| IBB3403               | ST3  | CC1  | 3               | 3    | 2    | 3    | 3    | 3    | 3   |
| INF126                | ST3  | CC1  | 3               | 3    | 2    | 3    | 3    | 3    | 3   |
| Tac2                  | ST3  | CC1  | 3               | 3    | 2    | 3    | 3    | 3    | 3   |
| UBA11300              | ST3  | CC1  | 3               | 3    | 2    | 3    | 3    | 3    | 3   |
| 1001287H_170206_H11   | ST4  | CC1  | 3               | 3    | 2    | 3    | 3    | 3    | 4   |
| IPLA31405             | ST4  | CC1  | 3               | 3    | 2    | 3    | 3    | 3    | 4   |
| LG728                 | ST4  | CC1  | 3               | 3    | 2    | 3    | 3    | 3    | 4   |
| MGBC116427            | ST4  | CC1  | 3               | 3    | 2    | 3    | 3    | 3    | 4   |
| UBA5784               | ST4  | CC1  | 3               | 3    | 2    | 3    | 3    | 3    | 4   |
| I113                  | ST5  | Sing | 4               | 4    | 3    | 4    | 4    | 4    | 5   |
| 21881                 | ST10 | CC3  | 9               | 9    | 4    | 7    | 7    | 9    | 3   |
| FDAARGOS_1002         | ST10 | CC3  | 9               | 9    | 4    | 7    | 7    | 9    | 3   |
| M14                   | ST10 | CC3  | 9               | 9    | 4    | 7    | 7    | 9    | 3   |
| TB25                  | ST12 | CC3  | 9               | 9    | 2    | 7    | 7    | 10   | 3   |
| LG9                   | ST13 | CC1  | 10              | 3    | 2    | 3    | 3    | 3    | 4   |
| UNIUD074              | ST13 | CC1  | 10              | 3    | 2    | 3    | 3    | 3    | 4   |
| 8831                  | ST14 | Sing | 11              | 8    | 2    | 9    | 6    | 11   | 10  |
| PAQ102015-99          | ST14 | Sing | 11              | 8    | 2    | 9    | 6    | 11   | 10  |
| ATCC49156             | ST16 | CC2  | 12              | 12   | 6    | 10   | 8    | 13   | 6   |
| JJN1                  | ST17 | CC2  | 12              | 12   | 7    | 10   | 8    | 13   | 6   |
| Lg2                   | ST17 | CC2  | 12              | 12   | 7    | 10   | 8    | 13   | 6   |
| LG791                 | ST17 | CC2  | 12              | 12   | 7    | 10   | 8    | 13   | 6   |
| A1                    | ST18 | Sing | 13              | 13   | 8    | 11   | 9    | 14   | 12  |
| DCC43                 | ST18 | Sing | 13              | 13   | 8    | 11   | 9    | 14   | 12  |
| FDAARGOS_893          | ST18 | Sing | 13              | 13   | 8    | 11   | 9    | 14   | 12  |
| KS1546                | ST21 | Sing | 9               | 9    | 10   | 7    | 11   | 10   | 3   |
| Hebei-B-22            | ST24 | Sing | 17              | 16   | 2    | 7    | 12   | 9    | 3   |
| Lg-ilsanpaik-gs201105 | ST24 | Sing | 17              | 16   | 2    | 7    | 12   | 9    | 3   |
| FDAARGOS_1062         | ST35 | CC3  | 9               | 9    | 2    | 7    | 7    | 9    | 3   |
| Lg-Granada            | ST38 | CC1  | 3               | 23   | 2    | 3    | 3    | 3    | 4   |
| TILSE2                | ST39 | Sing | 5               | 24   | 2    | 23   | 17   | 19   | 6   |
| TILSE6                | ST39 | Sing | 5               | 24   | 2    | 23   | 17   | 19   | 6   |
| CT2                   | ST41 | Sing | 25              | 25   | 9    | 25   | 10   | 21   | 21  |
| DM12426               | ST41 | Sing | 25              | 25   | 9    | 25   | 10   | 21   | 21  |
| DB24910               | ST42 | Sing | 26              | 25   | 13   | 20   | 18   | 22   | 22  |

---

|                    |      |      |    |    |    |    |    |    |    |
|--------------------|------|------|----|----|----|----|----|----|----|
| FISHB              | ST43 | Sing | 27 | 26 | 9  | 26 | 19 | 23 | 23 |
| Gansu-H-11         | ST46 | Sing | 29 | 4  | 3  | 27 | 4  | 4  | 5  |
| Gansu-H-12         | ST46 | Sing | 29 | 4  | 3  | 27 | 4  | 4  | 5  |
| Hebei-B-02         | ST46 | Sing | 29 | 4  | 3  | 27 | 4  | 4  | 5  |
| Hebei-B-21         | ST46 | Sing | 29 | 4  | 3  | 27 | 4  | 4  | 5  |
| Hebei-B-38         | ST46 | Sing | 29 | 4  | 3  | 27 | 4  | 4  | 5  |
| Hebei-C-03         | ST46 | Sing | 29 | 4  | 3  | 27 | 4  | 4  | 5  |
| InnerMongolia-F-06 | ST46 | Sing | 29 | 4  | 3  | 27 | 4  | 4  | 5  |
| InnerMongolia-F-07 | ST46 | Sing | 29 | 4  | 3  | 27 | 4  | 4  | 5  |
| Ningxia-I-14       | ST46 | Sing | 29 | 4  | 3  | 27 | 4  | 4  | 5  |
| Shandong-K-29      | ST46 | Sing | 29 | 4  | 3  | 27 | 4  | 4  | 5  |
| Shandong-K-30      | ST46 | Sing | 29 | 4  | 3  | 27 | 4  | 4  | 5  |
| Shanxi-J-24        | ST46 | Sing | 29 | 4  | 3  | 27 | 4  | 4  | 5  |
| Shanxi-J-25        | ST46 | Sing | 29 | 4  | 3  | 27 | 4  | 4  | 5  |
| Hebei-E-05         | ST47 | CC5  | 29 | 27 | 3  | 27 | 4  | 24 | 14 |
| Ningxia-I-16       | ST47 | CC5  | 29 | 27 | 3  | 27 | 4  | 24 | 14 |
| Ningxia-I-17       | ST47 | CC5  | 29 | 27 | 3  | 27 | 4  | 24 | 14 |
| Ningxia-I-23       | ST47 | CC5  | 29 | 27 | 3  | 27 | 4  | 24 | 14 |
| Ningxia-I-28       | ST47 | CC5  | 29 | 27 | 3  | 27 | 4  | 24 | 14 |
| Ningxia-I-13       | ST48 | Sing | 4  | 4  | 3  | 20 | 4  | 24 | 14 |
| Ningxia-I-15       | ST48 | Sing | 4  | 4  | 3  | 20 | 4  | 24 | 14 |
| Ningxia-I-18       | ST48 | Sing | 4  | 4  | 3  | 20 | 4  | 24 | 14 |
| Ningxia-I-19       | ST48 | Sing | 4  | 4  | 3  | 20 | 4  | 24 | 14 |
| Ningxia-I-20       | ST48 | Sing | 4  | 4  | 3  | 20 | 4  | 24 | 14 |
| Ningxia-I-26       | ST48 | Sing | 4  | 4  | 3  | 20 | 4  | 24 | 14 |
| Ningxia-I-27       | ST48 | Sing | 4  | 4  | 3  | 20 | 4  | 24 | 14 |
| Shandong-M-36      | ST48 | Sing | 4  | 4  | 3  | 20 | 4  | 24 | 14 |
| Shanxi-A-01        | ST48 | Sing | 4  | 4  | 3  | 20 | 4  | 24 | 14 |
| Hebei-B-39         | ST49 | CC4  | 30 | 28 | 3  | 28 | 21 | 4  | 18 |
| Hebei-L-31         | ST49 | CC4  | 30 | 28 | 3  | 28 | 21 | 4  | 18 |
| Hebei-L-32         | ST49 | CC4  | 30 | 28 | 3  | 28 | 21 | 4  | 18 |
| Hebei-L-33         | ST49 | CC4  | 30 | 28 | 3  | 28 | 21 | 4  | 18 |
| Hebei-L-35         | ST49 | CC4  | 30 | 28 | 3  | 28 | 21 | 4  | 18 |
| Hebei-G-08         | ST50 | CC5  | 29 | 29 | 3  | 27 | 4  | 24 | 14 |
| Hebei-G-09         | ST50 | CC5  | 29 | 29 | 3  | 27 | 4  | 24 | 14 |
| Hebei-G-10         | ST50 | CC5  | 29 | 29 | 3  | 27 | 4  | 24 | 14 |
| Hebei-L-34         | ST50 | CC5  | 29 | 27 | 3  | 27 | 4  | 24 | 14 |
| InnerMongolia-D-04 | ST51 | Sing | 31 | 4  | 3  | 4  | 14 | 4  | 14 |
| Shandong-M-37      | ST52 | CC4  | 31 | 28 | 3  | 28 | 21 | 4  | 18 |
| 122061             | ST53 | Sing | 32 | 26 | 14 | 28 | 10 | 25 | 14 |
| EP01               | ST54 | Sing | 33 | Ab | 15 | 29 | 22 | 26 | 24 |
| FDAARGOS_1063      | ST55 | Sing | 34 | 21 | 16 | 30 | 7  | 27 | 25 |
| M79                | ST56 | Sing | 35 | 30 | 17 | 31 | 23 | 28 | 26 |
| RTCLI04            | ST56 | Sing | 35 | 30 | 17 | 31 | 23 | 28 | 26 |

---

---

|                 |      |      |    |    |   |    |    |    |    |
|-----------------|------|------|----|----|---|----|----|----|----|
| MGYG-HGUT-00230 | ST57 | Sing | 36 | 6  | 2 | 32 | 24 | 8  | 27 |
| lg38            | ST58 | Sing | 37 | 31 | 1 | 33 | 25 | 29 | 28 |

---

CC, clonal complexes; Sing, singleton; ST, sequence type; Ab, absent.

**Table 3** Minimum inhibitory concentration (MIC) of the 15 antimicrobials tested for 39 *Lactococcus garvieae* isolates isolated from clinical mastitis composite milk samples in China and control strain ATCC 43921<sup>1</sup>.

| Antimicrobial               | MIC (µg/mL) |      |     |    |    |    |    |    |    |    |  |  |  |  |  | Resistance rate (%) | MIC50 (µg/mL) | MIC90 (µg/mL) |
|-----------------------------|-------------|------|-----|----|----|----|----|----|----|----|--|--|--|--|--|---------------------|---------------|---------------|
|                             | 0.12        | 0.25 | 0.5 | 1  | 2  | 4  | 8  | 16 | 32 | 64 |  |  |  |  |  |                     |               |               |
| Penicillin                  | 9           | 7    | 19  | 5  |    |    |    |    |    |    |  |  |  |  |  | 0                   | 1             | 2             |
| Ampicillin                  | 3           | 9    | 24  | 4  |    |    |    |    |    |    |  |  |  |  |  | 0                   | 1             | 1             |
| Amoxicillin/clavulanic acid | 1           | 4    | 26  | 9  |    |    |    |    |    |    |  |  |  |  |  | 0                   | 4             | 8             |
| Imipenem                    | 11          | 17   | 11  | 1  |    |    |    |    |    |    |  |  |  |  |  | 0                   | 0.25          | 0.5           |
| Cephalothin                 |             |      |     |    | 10 | 26 | 4  |    |    |    |  |  |  |  |  | 10                  | 8             | 8             |
| Cefazolin                   |             |      | 2   | 20 | 11 | 6  | 1  |    |    |    |  |  |  |  |  | 45                  | 2             | 8             |
| Cefpodoxime                 |             |      | 2   | 5  | 21 | 12 |    |    |    |    |  |  |  |  |  | 82.5                | 4             | 8             |
| Ceftiofur                   | 16          | 17   | 7   |    |    |    |    |    |    |    |  |  |  |  |  | 0                   | 0.25          | 64            |
| Amikacin                    |             |      |     |    | 4  | 5  |    |    |    |    |  |  |  |  |  | 90                  | 64            | 64            |
| Gentamicin                  |             |      | 1   | 12 | 12 | 15 |    |    |    |    |  |  |  |  |  | 37.5                | 4             | 8             |
| Erythromycin                | 19          | 6    | 13  | 2  |    |    |    |    |    |    |  |  |  |  |  | 5                   | 0.25          | 0.5           |
| Clindamycin                 |             |      |     |    | 1  | 23 | 11 | 5  |    |    |  |  |  |  |  | 100                 | 16            | 32            |
| Enrofloxacin                | 1           | 3    | 17  | 15 | 3  | 1  |    |    |    |    |  |  |  |  |  | 0                   | 0.5           | 1             |
| Marbofloxacin               |             |      | 2   | 20 | 15 | 3  |    |    |    |    |  |  |  |  |  | 0                   | 1             | 2             |
| Chloramphenicol             |             |      |     |    |    | 18 | 14 | 2  | 6  |    |  |  |  |  |  | 100                 | 16            | 64            |
| Vancomycin                  |             |      | 15  | 22 | 3  |    |    |    |    |    |  |  |  |  |  | 0                   | 1             | 1             |

1. Resistance breakpoints are highlighted by dark gray shading; intermediate breakpoints are highlighted by light gray shading; cells without shading indicate that no breakpoints were available in the literature.
